# Supplementary material for: Semi-Automated Library Preparation for High-Throughput DNA Sequencing Platforms
Source: Hindawi journal article supplement (doi:10.1155/2010/617469), 2010-01-01

Table S1. SOLiD P1 and P2 barcoded adaptors were prepared following the SOLiD protocol (Applied Biosystems, Foster City, CA). Individual stocks of HPLC-purified oligonucleotides (IDT, Coralville, IA) were prepared at 1mM concentration. The adaptors were prepared by mixing equal molar amounts of each correspondent oligonucleotides per barcode with 5X ligase buffer. The mix was hybridized on a PCR machine by running the program: 95°C for 5 min, 72°C for 5 min, 60°C for 5 min, 50°C for 3 min, 40°C for 3 min, 30°C for 3 min, 20°C for 3 min, 10°C for 3 min, and 4°C forever.

| Oligo Name           | Oligo Sequence                                     | Length |
|----------------------|----------------------------------------------------|--------|
| P1 Adaptor-5'-end    | ATCACCGACTGCCCATAGAGAGGTT                          | 25     |
| P1 Adaptor-3'-end    | CCTCTCTATGGGCAGTCGGTGAT                            | 23     |
| P2 Barcode-1-5'-end  | CGCCTTGGCCGTACAGCAGGGGCTTAGAGAATGAGGAACCCGGGGCAGTT | 50     |
| P2 Barcode-1-3'-end  | CTGCCCCGGGTTCTCATTCTCTAAGCCCCTGCTGTACGGCCAAGGCG    | 48     |
| P2 Barcode-2-5'-end  | CGCCTTGGCCGTACAGCAGGGTGTGAGAGAATGAGGAACCCGGGGCAGTT | 50     |
| P2 Barcode-2-3'-end  | CTGCCCCGGGTTCTCATTCTCTCACACCCTGCTGTACGGCCAAGGCG    | 48     |
| P2 Barcode-3-5'-end  | CGCCTTGGCCGTACAGCAGAAGGGGAGAGAATGAGGAACCCGGGGCAGTT | 50     |
| P2 Barcode-3-3'-end  | CTGCCCCGGGTTCTCATTCTCTCCCTTCTGCTGTACGGCCAAGGCG     | 48     |
| P2 Barcode-4-5'-end  | CGCCTTGGCCGTACAGCAGCCGATGAGAGAATGAGGAACCCGGGGCAGTT | 50     |
| P2 Barcode-4-3'-end  | CTGCCCCGGGTTCTCATTCTCTCATCGGCTGCTGTACGGCCAAGGCG    | 48     |
| P2 Barcode-5-5'-end  | CGCCTTGGCCGTACAGCAGCAACGAAGAGAATGAGGAACCCGGGGCAGTT | 50     |
| P2 Barcode-5-3'-end  | CTGCCCCGGGTTCTCATTCTCTTCGTTGCTGTACGGCCAAGGCG       | 48     |
| P2 Barcode-6-5'-end  | CGCCTTGGCCGTACAGCAGGTGCCAGAGAATGAGGAACCCGGGGCAGTT  | 50     |
| P2 Barcode-6-3'-end  | CTGCCCCGGGTTCTCATTCTCTGGGCACCTGCTGTACGGCCAAGGCG    | 48     |
| P2 Barcode-7-5'-end  | CGCCTTGGCCGTACAGCAGGTCTGGAGAGAATGAGGAACCCGGGGCAGTT | 50     |
| P2 Barcode-7-3'-end  | CTGCCCCGGGTTCTCATTCTCTCCAGACCTGCTGTACGGCCAAGGCG    | 48     |
| P2 Barcode-8-5'-end  | CGCCTTGGCCGTACAGCAGACGGAGAGAGAATGAGGAACCCGGGGCAGTT | 50     |
| P2 Barcode-8-3'-end  | CTGCCCCGGGTTCTCATTCTCTCTCCGTCTGCTGTACGGCCAAGGCG    | 48     |
| P2 Barcode-9-5'-end  | CGCCTTGGCCGTACAGCAGGAAGGGAGAGAATGAGGAACCCGGGGCAGTT | 50     |
| P2 Barcode-9-3'-end  | CTGCCCCGGGTTCTCATTCTCTCCCTTCTGCTGTACGGCCAAGGCG     | 48     |
| P2 Barcode-10-5'-end | CGCCTTGGCCGTACAGCAGGACCGCAGAGAATGAGGAACCCGGGGCAGTT | 50     |
| P2 Barcode-10-3'-end | CTGCCCCGGGTTCTCATTCTCTGCGGTCCTGCTGTACGGCCAAGGCG    | 48     |
| P2 Barcode-11-5'-end | CGCCTTGGCCGTACAGCAGCTCAGGAGAGAATGAGGAACCCGGGGCAGTT | 50     |
| P2 Barcode-11-3'-end | CTGCCCCGGGTTCTCATTCTCTCTGAGCTGCTGTACGGCCAAGGCG     | 48     |
| P2 Barcode-12-5'-end | CGCCTTGGCCGTACAGCAGAGCGTTAGAGAATGAGGAACCCGGGGCAGTT | 50     |
| P2 Barcode-12-3'-end | CTGCCCCGGGTTCTCATTCTCTAACGCTCTGCTGTACGGCCAAGGCG    | 48     |
| P2 Barcode-13-5'-end | CGCCTTGGCCGTACAGCAGCGGGTCAGAGAATGAGGAACCCGGGGCAGTT | 50     |
| P2 Barcode-13-3'-end | CTGCCCCGGGTTCTCATTCTCTGACCCGCTGCTGTACGGCCAAGGCG    | 48     |
| P2 Barcode-14-5'-end | CGCCTTGGCCGTACAGCAGCGTCTGAGAGAATGAGGAACCCGGGGCAGTT | 50     |
| P2 Barcode-14-3'-end | CTGCCCCGGGTTCTCATTCTCTCAGACGCTGCTGTACGGCCAAGGCG    | 48     |
| P2 Barcode-15-5'-end | CGCCTTGGCCGTACAGCAGTAGCGTAGAGAATGAGGAACCCGGGGCAGTT | 50     |
| P2 Barcode-15-3'-end | CTGCCCCGGGTTCTCATTCTCTACGCTACTGCTGTACGGCCAAGGCG    | 48     |
| P2 Barcode-16-5'-end | CGCCTTGGCCGTACAGCAGGCGTTTAGAGAATGAGGAACCCGGGGCAGTT | 50     |
| P2 Barcode-16-3'-end | CTGCCCCGGGTTCTCATTCTCTAAACGCCTGCTGTACGGCCAAGGCG    | 48     |
| Primer PCR-1         | CCACTACGCCTCCGCTTTCCTCTCTATGGGCAGTCGGTGAT          | 41     |
| Primer PCR-2         | CTGCCCCGGGTTCTCATTCT                               | 21     |

Table S2. Mitochondrial candidate genes used in sample preparation

| ENSEMBL-GENE-ID  | ENSEMBL-PEPTIDE-ID | PEPTIDE-SEQUENCE             | COUNT |
|------------------|--------------------|------------------------------|-------|
| ENSG00000005156  | ENSP00000262327    | MSLAFKIFFPQTLRALSRKELCLFRKH  | 949   |
| ENSG00000005156  | ENSP00000367787    | MSLAFKIFFPQTLRALSRKELCLFRKH  | 1009  |
| ENSG000000021574 | ENSP00000320885    | MNSPGGRGKKKGSGGASNPVPPRPPF   | 616   |
| ENSG000000021574 | ENSP00000340817    | MNSPGGRGKKKGSGGASNPVPPRPPF   | 584   |
| ENSG000000023228 | ENSP00000233190    | MLRIPVRKALVGLSKSPKGCVRTTAT/  | 727   |
| ENSG000000025708 | ENSP00000252029    | MAALMTPGTGAPPAPGDFSGEGSQGI   | 482   |
| ENSG000000025708 | ENSP00000379036    | MAALMTPGTGAPPAPGDFSGEGSQGI   | 482   |
| ENSG000000025708 | ENSP00000379037    | MAALMTPGTGAPPAPGDFSGEGSQGI   | 482   |
| ENSG000000025708 | ENSP00000379038    | MAALMTPGTGAPPAPGDFSGEGSQGI   | 487   |
| ENSG000000029639 | ENSP00000356134    | MAASGKLSTCRLPPLPTIREIHKLLRLC | 346   |
| ENSG000000076248 | ENSP00000242576    | MIGQKTLYSFFSPSPARKRHAPSPEPA  | 313   |
| ENSG000000076248 | ENSP00000337398    | MGVFCLGPWGLGRKL RTPGKGPLQL   | 304   |
| ENSG000000099817 | ENSP00000215587    | MDDEEETYRLWKIRKTIMQLCHDRG'   | 210   |
| ENSG00000104936  | ENSP00000291270    | MSAEVRLRRLQQLVLDPGFLGLEPLL   | 629   |
| ENSG00000104936  | ENSP00000314954    | MGGHFWPEPYTVFMWGWSPWEADSI    | 609   |
| ENSG00000104936  | ENSP00000342201    | MSAEVRLRRLQQLVLDPGFLGLEPLL   | 629   |
| ENSG00000104936  | ENSP00000345997    | MGGHFWPEPYTVFMWGWSPWEADSI    | 631   |
| ENSG00000104936  | ENSP00000346168    | MGGHFWPEPYTVFMWGWSPWEADSI    | 575   |
| ENSG00000106028  | ENSP00000265304    | MFRRPVLQVLRQFVRHESETTSLVLI   | 148   |
| ENSG00000107815  | ENSP00000309595    | MWVLLRSGYPLRILLPLRGEWMGRR    | 684   |
| ENSG00000107815  | ENSP00000359248    | MWVLLRSGYPLRILLPLRGEWMGRR    | 582   |
| ENSG00000108064  | ENSP00000363002    | MAFLRSMWGVLSALGRSGAELCTGC    | 214   |
| ENSG00000108064  | ENSP00000363006    | MAFLRSMWGVLSALGRSGAELCTGC    | 246   |
| ENSG00000110025  | ENSP00000301886    | MSRQAKDDFLRHYTVSDPRTHPKGY'   | 342   |
| ENSG00000110025  | ENSP00000316410    | MSRQAKDDFLRHYTVSDPRTHPKGY'   | 256   |
| ENSG00000110025  | ENSP00000366452    | MSRQAKDDFLRHYTVSDPRTHPKGY'   | 342   |
| ENSG00000113580  | ENSP00000231509    | MDSKESLTPGREENPSSVLAQERGDV   | 778   |
| ENSG00000113580  | ENSP00000343205    | MDSKESLTPGREENPSSVLAQERGDV   | 777   |
| ENSG00000113580  | ENSP00000354274    | MDSKESLTPGREENPSSVLAQERGDV   | 593   |
| ENSG00000113580  | ENSP00000377977    | MDSKESLTPGREENPSSVLAQERGDV   | 777   |
| ENSG00000113580  | ENSP00000377979    | MDSKESLTPGREENPSSVLAQERGDV   | 777   |
| ENSG00000114026  | ENSP00000303132    | MPARALLPRRMGHRTLASTPALWASII  | 357   |
| ENSG00000114026  | ENSP00000305527    | MPARALLPRRMGHRTLASTPALWASII  | 356   |
| ENSG00000114026  | ENSP00000305584    | MPARALLPRRMGHRTLASTPALWASII  | 410   |
| ENSG00000114026  | ENSP00000306561    | MPARALLPRRMGHRTLASTPALWASII  | 424   |
| ENSG00000114026  | ENSP00000341434    | MVERLCQAFGPRLIQLDDV TYHG FPS | 197   |
| ENSG00000114026  | ENSP00000342851    | MPARALLPRRMGHRTLASTPALWASII  | 345   |
| ENSG00000114026  | ENSP00000344899    | MLPWLNCITTGVPWTP TSKRWLRNSI  | 194   |
| ENSG00000114026  | ENSP00000345520    | MPARALLPRRMGHRTLASTPALWASII  | 324   |
| ENSG00000114026  | ENSP00000352791    | MPARALLPRRMGHRTLASTPALWASII  | 322   |
| ENSG00000114026  | ENSP00000373336    | MVERLCQAFGPRLIQLDDV TYHG FPS | 199   |
| ENSG00000114026  | ENSP00000373337    | MPARALLPRRMGHRTLASTPALWASII  | 195   |
| ENSG00000114956  | ENSP00000264093    | MAAGRLFLSRLRAPFSSMAKSPLGV    | 277   |
| ENSG00000114956  | ENSP00000306964    | MAAGRLFLSRLRAPFSSMAKSPLGV    | 189   |
| ENSG00000114956  | ENSP00000345009    | MAAGRLFLSRLRAPFSSMAKSPLGV    | 239   |
| ENSG00000114956  | ENSP00000349294    | MAAGRLFLSRLRAPFSSMAKSPLGV    | 255   |
| ENSG00000115204  | ENSP00000233545    | MALWRAYQRALAAHPWKVQVLTAG     | 176   |
| ENSG00000115204  | ENSP00000369383    | MALWRAYQRALAAHPWKVQVLTAG     | 176   |
| ENSG00000122971  | ENSP00000242592    | MAAALLARASGPARRALCPRAWRQL    | 412   |
| ENSG00000123297  | ENSP00000242983    | MSLLRSLRVFLVARTGSYPAGSLLRQS  | 325   |
| ENSG00000123297  | ENSP00000313877    | MSLLRSLRVFLVARTGSYPAGSLLRQS  | 346   |
| ENSG00000132781  | ENSP00000346354    | MRKPRAAVGSGHRKQAASQEGRQKI    | 522   |
| ENSG00000132781  | ENSP00000347685    | MRKPRAAVGSGHRKQAASQEGRQKI    | 521   |

|                 |                 |                             |      |
|-----------------|-----------------|-----------------------------|------|
| ENSG00000132781 | ENSP00000352239 | SVFCCLHQRGPRAIMRKPRAAVGS    | 546  |
| ENSG00000132781 | ENSP00000361170 | MTPLVSRLSRLWAIMRKPRAAVGS    | 546  |
| ENSG00000132781 | ENSP00000361172 | MTPLVSRLSRLWEVNQLWAGLGYY    | 215  |
| ENSG00000132781 | ENSP00000361176 | MRKPRAAVGSGHRKQAASQEGRQK    | 521  |
| ENSG00000132781 | ENSP00000361182 | MTPLVSRLSRLWAIMRKPRAAVGS    | 536  |
| ENSG00000132781 | ENSP00000361187 | MTPLVSRLSRLWAIMRKPRAAVGS    | 535  |
| ENSG00000136143 | ENSP00000367909 | SGRGHPSEPPASDGPAGCCSGSKDV   | 393  |
| ENSG00000136143 | ENSP00000367912 | MAASMFYGRVLAVATLRNHRPRTAQ   | 441  |
| ENSG00000136143 | ENSP00000367923 | MAASMFYGRVLAVATLRNHRPRTAQ   | 463  |
| ENSG00000136480 | ENSP00000317618 | MRSRVAVRACHKVCRCLLSGFGGRV   | 485  |
| ENSG00000138095 | ENSP00000260665 | MAALLRSARWLLRAGAAPRLPLSLR   | 1394 |
| ENSG00000140521 | ENSP00000268124 | MSRLLWRKVAGATVGPVPAPGRW     | 1239 |
| ENSG00000148290 | ENSP00000361042 | MAAVAALQLGLRAAGLGRAPASAAW   | 300  |
| ENSG00000151729 | ENSP00000281456 | MGDHAWSFLKDFLAGGVAAAVSKTA   | 298  |
| ENSG00000166548 | ENSP00000299697 | MRPGLFKGQAPGSRRRPTAGLAVVR   | 307  |
| ENSG00000167136 | ENSP00000361725 | MRALRAGLTLASGAGLGAVVEGWRR   | 297  |
| ENSG00000167792 | ENSP00000322450 | MLATRLLGWSLPARVSVRFSGDTTA   | 464  |
| ENSG00000168827 | ENSP00000264263 | MRLLGAAVAALGRGRAPASLGWQR    | 751  |
| ENSG00000168827 | ENSP00000327081 | MFLEEKIPSISDLKLAIIRATLKRSFT | 144  |
| ENSG00000169188 | ENSP00000364126 | MLRVVSWNINGIRRPLQGVANQEPSN  | 518  |
| ENSG00000171497 | ENSP00000303754 | MSHSPQAKPSNPSNPRVFFDVIDIGG  | 370  |
| ENSG00000177192 | ENSP00000324726 | MAGNAEPPAGAACPDRRSCSGRA     | 399  |
| ENSG00000177192 | ENSP00000365837 | MGLQLRALLGAFGRWTLRLGPRPSC   | 427  |
| ENSG00000177302 | ENSP00000321636 | MIFPVARYALRWLRRPEDRAFSRAAM  | 1001 |
| ENSG00000184428 | ENSP00000328835 | MRVVRLRLRAALTLLGEVPRRPASR   | 601  |
| ENSG00000196365 | ENSP00000351177 | MAASTGYVRLWGAARCWVLRPML     | 895  |
| ENSG00000196365 | ENSP00000353826 | MAASTGYVRLWGAARCWVLRPML     | 959  |
| ENSG00000198836 | ENSP00000354429 | MWRLRRAAVACEVCQSLVKHSSGIK   | 978  |
| ENSG00000198836 | ENSP00000354681 | MWRLRRAAVACEVCQSLVKHSSGIK   | 997  |
| ENSG00000198836 | ENSP00000354781 | MWRLRRAAVACEVCQSLVKHSSGIK   | 961  |
| ENSG00000198836 | ENSP00000355311 | MWRLRRAAVACEVCQSLVKHSSGIK   | 979  |
| ENSG00000198836 | ENSP00000355324 | MWRLRRAAVACEVCQSLVKHSSGIK   | 1015 |
| ENSG00000198836 | ENSP00000376231 | LLRIRLALIIEVCQSLVKHSSGIKSL  | 1015 |
| ENSG00000198836 | ENSP00000376232 | MWRLRRAAVACEVCQSLVKHSSGIK   | 166  |
| ENSG00000198836 | ENSP00000376233 | MWRLRRAAVACEVCQSLVKHSSGIK   | 960  |
| ENSG00000065057 | ENSP00000219066 | MCSPQESGMTALSARMLTRSRLGPG   | 312  |
| ENSG00000104936 | ENSP00000366979 | MVLPVQHVSARGAAEAAPAAGVGPGL  | 655  |
| ENSG00000108064 | ENSP00000378776 | MAFLRSMWGVLSALGRSGAELCTGC   | 103  |
| ENSG00000136143 | ENSP00000367898 | MAASMFYGRVLAVATLRNHRPRTAQ   | 154  |
| ENSG00000171865 | ENSP00000313350 | MSWLLFLAHRVALAALPCRRGSRGFC  | 286  |

Table S3. Primer sequence used to amplify 438 exons present in the 32 samples used in this study

| Exon ID          | Gene_ID           | Forward_primer                  | Reverse_primer                  |
|------------------|-------------------|---------------------------------|---------------------------------|
| ENSE00000343045  | ENSEG00000005156  | CCAACTCCTTTTCTTGCTCTTATCTT      | AGATCTCAGGGCTGGAATGTGAGACT      |
| ENSE00000713843  | ENSEG00000005156  | GCTAGATCTGGTGTGTAGCAGTGAAGG     | CTGTACCTCAAGCGGTACCTTCTAAAACA   |
| ENSE00000713847  | ENSEG00000005156  | GCCTTCCACATGTTGTTCTATATCCTG     | CCCACATGTACATACCTCACTCACACTCAT  |
| ENSE000008087588 | ENSEG00000005156  | TCCAGAAGTGGACTGGTACTCTCTATTT    | CTCACCCAGGAAATGAAAAACAGATTCT    |
| ENSE00000887594  | ENSEG00000005156  | TTTGTATTTTTTTGTAGAGACGGGGTTG    | AGAGGACATGTGAATGGCTCTAGATGCC    |
| ENSE00000903608  | ENSEG00000005156  | CACAATACCCTATACCTACTACCCCCA     | ACAGAATTTTCACTCTTTAGCCAAGATCC   |
| ENSE00001106043  | ENSEG00000005156  | TCGTGTAGTTTCTTCTTCCCTTTCTT      | AACATACAGCTCACATGCCCAAGGAAG     |
| ENSE00001106059  | ENSEG00000005156  | ATCCACATAGGCACAGTATCTCAAAGAG    | AACACTCATACCTTATCTGATCTCAGCC    |
| ENSE00001106065  | ENSEG00000005156  | AGGTAACTACCTCTACTAACCCAGTTGC    | TATTGTGTACCACAGCTGGAATGGCTA     |
| ENSE00001160722  | ENSEG00000005156  | CAAACCTTGTGAGCTTAAGCAATTCTCC    | AAACAGTATGTGCCCAACCAGAAAAA      |
| ENSE00001331210  | ENSEG00000005156  | GACTATAAGACGCTGGCCTTTGGAA       | AACCTCTATCCCTTTTTTCTCTCAGCAC    |
| ENSE00001429066  | ENSEG00000005156  | TGAAAACACTCCCAACATCACAGGG       | CACGTCACGGAGGGGTGTGCCCG         |
| ENSE00000742217  | ENSEG000000021574 | GTTTGCTTGTCTTTATGTTACGTACAATT   | AGCCTGGAAAAACAAGAGTCTCAAAAA     |
| ENSE00000809459  | ENSEG000000021574 | TCATGTAACAATCTGGTAACACCTTGAG    | GTGAAAACATGAACAATTAACACTCACCATT |
| ENSE00000809466  | ENSEG000000021574 | AAAGGATGCTTTTAGATGGCAAGAGT      | GCAAGTCGTAATAATAGACTCAAGGACA    |
| ENSE00000809468  | ENSEG000000021574 | ACACCTGGCCTCATAGCTTCAATTTTA     | CAACACAAATGTACATAACTTCTACTCTGA  |
| ENSE00000809475  | ENSEG000000021574 | CGATGCTAGTAGACGCCTAAACACTGAA    | TGGTAACAAGAGGCTAGAGATAGTACTGGAA |
| ENSE00000809476  | ENSEG000000021574 | ACATTGATAACTACCAAAATGCATTCCA    | TCAAGATGGTAGTCTTGTCTTCTGCTCT    |
| ENSE00000809479  | ENSEG000000021574 | CGAGGCTATAGTGAGCTATGATTGTGC     | GGAGGTAGAGGATGAGAGAAAGTCTCTG    |
| ENSE00000809480  | ENSEG000000021574 | AACAAGAGCAAAACTCCATCTCAAAAAA    | TTTGACTCTTAAACTTCTTAAGGTGGTA    |
| ENSE00001070179  | ENSEG000000021574 | GACTGTGTCACAACTGTTTTTTATGT      | GATCTGAAATCTGGACAATCATGTGAATA   |
| ENSE00001070181  | ENSEG000000021574 | CCCCATGAAAGTAGTTTGGGTGATAAT     | GGACCACATTTTCAACTACTGATCTATT    |
| ENSE00000469826  | ENSEG00000023228  | TTCTAAATGGAAAAACATTCAGTTCACTA   | GGGTTTTTTGACATGTGTAAGGAAATTA    |
| ENSE00000784949  | ENSEG00000023228  | CACGTGAACTTGAATCTCTGTTCTGTA     | TGAGGTGGGCTTAAATTTTATTACTTCAC   |
| ENSE00000657760  | ENSEG00000025708  | GTGACTCATGAGTAACCTTGACCAAGTG    | ATACTTTCCAATCCAGCTGCACCTCTA     |
| ENSE00000657761  | ENSEG00000025708  | AGAAGCCTTGGTAGGGTCTTGGAG        | GAGAGACTTTGGGTCCCTGGGGGTG       |
| ENSE00000765449  | ENSEG00000029639  | AAGGTTCTCACTCTTAAAAAGTGCTGAG    | ATGATCACACTATGCCACATATCATGC     |
| ENSE00000813879  | ENSEG00000029639  | CCTACATAATCTTTGGTACCTTTGGGGT    | TGATTGGGTAATGGCTGAATTTTATAG     |
| ENSE00000813880  | ENSEG00000029639  | GAGTTCGTATACAAGAGGTCGAAGGAC     | GTCTGACCAATGGGCTGACTCCGAGG      |
| ENSE00000900737  | ENSEG00000029639  | ATAATTTGGAAGCAAGTAGCAAGAGAAA    | CCCTGGTCTCTGACTTTTTTAAGTGAATT   |
| ENSE00000900739  | ENSEG00000029639  | ATCAAGGTTTTAACTTTTGGCTGAGCTG    | CAGCTGATTTTACTGCTCACTGAAATGT    |
| ENSE00000900741  | ENSEG00000029639  | AGTGTGAGTTTGCACATAAACAAGGTT     | CTCTTTTCACTAATCAGGCTGGACTAA     |
| ENSE00000514467  | ENSEG00000065057  | TTCTGAGGCTCTCTCAGGCCACT         | AGATGACCAAAACATACCAAAACAGAC     |
| ENSE00000665105  | ENSEG00000065057  | GAAAGAAAAACAAGGACCTTGCTAAGATG   | CACCCCTACCCCTACTCTCACTGT        |
| ENSE00000665121  | ENSEG00000065057  | GAGCACCTTTCTGACTCTATGGGCT       | GTAGCTCTGGCCACTGTGGGGTCTCCT     |
| ENSE00000754701  | ENSEG00000076248  | CAGGCACGTTTTTGTGTGTGTGT         | TGTGGCTTAACCTCAGTGTCCCTAATT     |
| ENSE00000754703  | ENSEG00000076248  | TGTTTGTGTATGTTTGTGTGAGGCAG      | AAGCTAAGTACACATCTGAAAGGAATCATGT |
| ENSE00000754705  | ENSEG00000076248  | GGCTGGCTGTAACCTTCAACCTTTTCA     | ACAGAGTGAGACTCGGCTCTAAAAAA      |
| ENSE00001130047  | ENSEG00000076248  | GAAGGCACAAAGCGAATGAAAGAAATAG    | AACACGTGGAGGCTAATTTGGAAGGC      |
| ENSE00001345324  | ENSEG00000076248  | GGACCCAGAGGGAGGTTTTTTGC         | CTAAGCCTACGGAACATGAACCTTGG      |
| ENSE00000665196  | ENSEG00000099817  | CCACGCTTTATCCAAAGTAGC           | CTCTTGCTCGCTGGAAGGCGCAG         |
| ENSE00000665197  | ENSEG00000099817  | GTCTCCATGCACTAATAGGAACACCT      | GTAGCTTAGGCGAGGAAATGGGGTTG      |
| ENSE00000665199  | ENSEG00000099817  | GTACTGCTTGGGGAGGAGGCTG          | GAGAGACACCTGTGTGGAATGGGG        |
| ENSE00000892419  | ENSEG00000099817  | GACTGAGAGGGAACTAGAAAGAAGCTG     | GTTTGCTGTTCACTCTGCTCTCGC        |
| ENSE00000892420  | ENSEG00000099817  | CTCCGACGAGAGTACGAGGAGAC         | GTTAGGCGGAGGGGGCTGATTC          |
| ENSE00001055171  | ENSEG00000099817  | AAGAGACAGACACGCTCACGCCCTA       | CTGTCTGGGCATACTGGATCTGC         |
| ENSE00001112731  | ENSEG00000104936  | CAAAACAGTAAGGTTCCAAGACTGATCC    | GTAAGCCAAGATCAAAAAGCAGTGAGG     |
| ENSE00001112739  | ENSEG00000104936  | AAGCCCTCACCTTTTCTTCCCAAT        | TCTGGTTCTCCACAGAGAATCAGCAAT     |
| ENSE00001475019  | ENSEG00000104936  | CTTGACTCCAGGTGACAGTTCAAGT       | ACTTGAGTCTGGGATATGTGACCATGCTA   |
| ENSE00001475022  | ENSEG00000104936  | CTACAAGGACCCCTCGAGGCCCTG        | GAGTCCCAGGAGCCAAATCAGAGG        |
| ENSE00001475052  | ENSEG00000104936  | TAAGGCTCGGTCAATCATCAATTTCTAA    | CCGTTACCCAGGACATTTCAATGA        |
| ENSE00000727732  | ENSEG00000106028  | TGAGTAATCTTCTGTGTGCAATTTGCCT    | ACAACACATTTGAGATTGGCAAATTA      |
| ENSE00000872183  | ENSEG00000106028  | TATCCAAGTCTGTTTGGCACTCTGTTT     | GCCAAGCTTTTAAAAAGAAAAGGAGAAA    |
| ENSE00001043132  | ENSEG00000106028  | AACTTGTAGTCCACTTATGCCAACTG      | GATTATACCACAAAAAGGAGAGCGAGAAC   |
| ENSE00001090027  | ENSEG00000106028  | CTGGTGAGTTGTAATTTTGGCCATAAGAG   | AAGTCTTCTGATCACTGTGGCTGATAGT    |
| ENSE00001206769  | ENSEG00000106028  | AAACTTGAACCTTCCAAACTCACCCT      | ACCTACACAGAAACACCTCCCGAC        |
| ENSE00000721463  | ENSEG00000107815  | CTTCACAGGTAACCTTTGAGAAATCAC     | CTAAGGAGATGGGGAGTTCCTACTG       |
| ENSE00000721468  | ENSEG00000107815  | AGTTTTCAGGATGCTAGTTCTTCTGCCT    | TGAGAAGTGTGTGTGTATGTCCAAGC      |
| ENSE00000705087  | ENSEG00000108064  | AATCCATATACATCTCATCCAGAGCAC     | TCTGCCTAACTGAAGAATACTTGATGACA   |
| ENSE00000833891  | ENSEG00000108064  | AAAATTTGACCGCAAGATGTAATAATCA    | CATGGCACTTAGAGATTTTCTGCTTAAATA  |
| ENSE00000985817  | ENSEG00000108064  | ATGGATTGTGCTTTCTGATGATCTTT      | ATGACAATTGCTCTCAACTGCAGAAATAC   |
| ENSE00001274058  | ENSEG00000108064  | ATTTCTGTGAAGCGTTTGGATACATAG     | CATTGGTATTTAACTGCTTAATGGCAATTT  |
| ENSE00000729668  | ENSEG00000110025  | ACCTTGATCTTCCAGGTGATCCTTCAC     | GCACCCAGCCTTTTGGTTATTTTAAAT     |
| ENSE00000863754  | ENSEG00000110025  | ACGAGCGCTCGGCCAATGCACTAT        | GTGACGCCAGGGGCACTGGGACGC        |
| ENSE00001119977  | ENSEG00000110025  | CTGGGGCTGCACAAACTCTCCCT         | ATTCCTTCTCTGCCCTGCTAGATTAG      |
| ENSE00001169473  | ENSEG00000110025  | GTCTTCTTCTTCTGTGTCTACAGTTT      | TGAGGAGACGCTCTCTCCCTGATCT       |
| ENSE00001169520  | ENSEG00000110025  | AATAAGAGTTGGGTGGATGAACGAAAG     | ATTCTGTGCTCTAAAAAGGGAGCAGTG     |
| ENSE00000910346  | ENSEG00000113580  | TCCCATTTTATTGGGCAAGTAACTTAT     | TATATTCCACCGGAAACAAGACAGAGG     |
| ENSE00001082911  | ENSEG00000113580  | TGGCTCTAGGAAAAATGTCTACAAAACT    | TGACACAGTGAGACCTTATCTATCTAAAA   |
| ENSE00001082912  | ENSEG00000113580  | TTCTGGTGTCACTTACTGTGCCCTTTCTA   | CTTTTTGGGGGGAAGTAGCAGTATT       |
| ENSE00001082913  | ENSEG00000113580  | AGGATTGTTTCACTCTGAATTTATCACA    | TTTTGACAGGGGCTAATTGATCTAATTG    |
| ENSE00001082914  | ENSEG00000113580  | GCATAATGATTGAAAAGCAGGGAGTAA     | TTGAATAAACTGTGTAGCGCAGACCTTC    |
| ENSE00001165146  | ENSEG00000114026  | AGAAAACATGTGTAGAGGGACAGGACC     | CATTCTCTGCTCTCTCTTAAGTGCAGT     |
| ENSE00001295658  | ENSEG00000114026  | CTATTGTAGGATAGGAGGGACCCCAA      | TGGCAAAACTGAGTCTAGAGAAGTGAC     |
| ENSE00001316654  | ENSEG00000114026  | AGTTTGTGTAACCTAGGATCTGACCTGTG   | AGAAATGAACAGATCTGAAAGCTGATGG    |
| ENSE00001498801  | ENSEG00000114026  | CTTCCACCTCCCAACACTGTCACTA       | GGAGTTTCTCTGCCCTCTCCCT          |
| ENSE00000761859  | ENSEG00000114956  | CTGATTGCATAAGAAAAACAAGACAGCAG   | TATATTCTGAACCTCTCTACAGGGGGCT    |
| ENSE00000846663  | ENSEG00000114956  | TTTTCTCCCTTATGGCTGTATTCAITA     | GGATACTCAACCTGGGCTACTTTACTCA    |
| ENSE00001121693  | ENSEG00000114956  | TGAGTAAGACTTGGCGAGTATGTGAAAC    | GGCCAGAAAGATAAAAGTACACAAGGGA    |
| ENSE00001200448  | ENSEG00000114956  | CCTTCACTCAACGCTCTTTTACAACAT     | AAAACAAGGAGGCAAGATACACAGTGC     |
| ENSE00001409499  | ENSEG00000114956  | CTTAGTACTGAGCAGGGAGGAGATAG      | CTTGGAGAATGTCACTTCTTAGGTTTCA    |
| ENSE00001411597  | ENSEG00000114956  | CCACATTTCTTCTCCATGCCTATTATT     | TCTAGAGGTGAATTAGAGCAAGCACC      |
| ENSE00001474840  | ENSEG00000114956  | TTCTCCAGGCTATTCTTACTCTGAAG      | CAGCAAAAACTCTCAATAGGCATGATA     |
| ENSE00000733143  | ENSEG00000115204  | TCAGAAATAGGGGAAGTGGACACTAAGAA   | TAGTCAATTGTTTCCACAATGAAGCCCT    |
| ENSE00001179981  | ENSEG00000115204  | CAACTACGCAATACCCCTTAAAAACAGC    | CTTTAAGTCAATTTGGAAGTGGGAAGGG    |
| ENSE00001483572  | ENSEG00000115204  | CAGCTCTAGAAATGACTCCCAATAGTT     | ACCTAAACCTGCCAATCCTTTGTCTAT     |
| ENSE00001127023  | ENSEG00000122971  | TGAGTTAGTGGGTCACTAGGATCTCTGG    | AACCTCCAGAGCAATTTCTGGGTTCT      |
| ENSE00001191815  | ENSEG00000122971  | TGTGTAGCAATTTTGATTAACGAATGTGG   | AGAAGTGGGGCAAGGCCGTGAG          |
| ENSE00001245851  | ENSEG00000122971  | ACTGAGAGCTTTGGGACCTCTCATCT      | AGAAGGCCCTAGAAAAAGAAATGACAGC    |
| ENSE00000920433  | ENSEG00000123297  | CATAAATCACTTCAITCTGTTCCAGGC     | AATAGGAACAGCAAAAGACCAATGAG      |
| ENSE00000920434  | ENSEG00000123297  | ACCTGATTTTGGCATTAGTGGTAGAC      | CTACTACAAGCTTTTACACCCAAGGGACAG  |
| ENSE00001180179  | ENSEG00000123297  | CACACCATTTGGATTGTACCAATTTTGC    | CTTTTTAGTGGAGACAGGGTTTCACT      |
| ENSE00001212269  | ENSEG00000132781  | CACCTGGCCCTTAGTAAGATCTTTAATG    | CTATCACCTTTGGAAGGCTCAAAAT       |
| ENSE00001456919  | ENSEG00000132781  | CCATTCTCTGTTTGGACTCTTTTATG      | TCTCTATCTTCAAAAAAGGGAACCTCT     |
| ENSE00001456937  | ENSEG00000132781  | AGTTCGAAACCAAGTCTGAGCAACATAG    | CTAGATCAGTAGAGTCGGGGAAGGGAG     |
| ENSE00000923430  | ENSEG00000136143  | AGTCTTATGCTTATGCAACAGTCCCT      | GGTTTTATCTTATACCATGTTTGGCA      |
| ENSE00000923431  | ENSEG00000136143  | AGCAAAAGTATAAACATTTTGCCCAAT     | TGGTTTGGTCTGAAAACTTTTCTATCAAGT  |
| ENSE00000923434  | ENSEG00000136143  | TGGGTCTAATAGTGTGTTGTTTAAATGGG   | GGTAGCTGCTATTTCAGTAATGTTTGACTAT |
| ENSE00000923435  | ENSEG00000136143  | AAGTTTTGACAATTACTTCAGTTGTACGGTT | CACGGTAGGTTTTTAAAGTTTCAITGAT    |
| ENSE00000923437  | ENSEG00000136143  | AACAGCTTTTGTCTTCTTGGACTAAAA     | ACAAAATACATGCTCTGGCATGCTGCTC    |
| ENSE00000923438  | ENSEG00000136143  | AAAAACAACTTCAAACTCTTCTCAGAGC    | TAGTTAGCAAGAGTGACTGCCAAATCA     |
| ENSE00001478130  | ENSEG00000136143  | TTCTAGTGGGTTCAGCAACTTCTCTTCT    | TATGTGGATTGCTTTTTTCTCAACTGGA    |
| ENSE00001478337  | ENSEG00000136143  | CTCACACCTCACCTTTTCTCTCTG        | CTAGGAAGTGTTCAGGTGTCTGACCC      |
| ENSE00000925352  | ENSEG00000136480  | TGTTAATTTCTGATTTTGATGACTTGA     | CATTGTCTGAATAAAAGTATCGGCAAT     |
| ENSE00000925353  | ENSEG00000136480  | GCACATAACATTAGAACAACAACAACCC    | CTCCGCTCTAAAAACAACAACAACAAA     |
| ENSE00001145805  | ENSEG00000136480  | TGCCATATGTTCTGTAAGAGGAACTG      | GGTGATTTTGGGCTTCACAAAATAGAA     |
| ENSE00001148964  | ENSEG00000136480  | TCCAAAGCGTTTTTGGATAATCACTCAAT   | AACAAACTATGCTTTTTTCCCTTTCC      |
| ENSE00001189058  | ENSEG00000136480  | GTAAGAAAAACAACCCCAATTTGCTTA     | CGTGGAGGAATTAATTTTACATTTGTG     |
| ENSE00000932579  | ENSEG00000138095  | TCACATGCAAAATTTCTATGCAAAAGTTAT  | TGGATGTGTGCTGTTCTTTAGCAGTTAAT   |
| ENSE00000932580  | ENSEG00000138095  | AAACAAGACACCTTGCTGAACATAAGC     | AAAATGTGACATTTTACCTTCACACTGA    |
| ENSE00000932592  | ENSEG00000138095  | TACCCAAAAATCTTGCAACAACAAGAAC    | TGGAACATTGGTGCAGTGTAATAATA      |

|                 |                 |                               |                               |
|-----------------|-----------------|-------------------------------|-------------------------------|
| ENSE0000096262  | ENSE00000138095 | CCCCATCAACAAACAAAAAGAGTAA     | TCAGAGCGTAATCTGTGACATGTTGTA   |
| ENSE0000096267  | ENSE00000138095 | CTTTCGTCAAGGAAACATCTTTGAAAC   | TGCATCATCAATTCCTCAAGTGATCTAGC |
| ENSE0000096263  | ENSE00000138095 | AGCCCTCTTACTCTGTGGTAAATGACCT  | AATAGCAGATGTTGTTTCCCTACATGAAA |
| ENSE0000096262  | ENSE00000138095 | GCCCTTCTTGCTGGTTCTTTCAACATA   | CCATTTAGCTTTTGTTGTTTCTACCTTA  |
| ENSE0000096263  | ENSE00000138095 | TATATACATAAATGAAGACTGGCCGAGA  | CTTCATATGACTGTTTCTTCGGGTTTTT  |
| ENSE0000096264  | ENSE00000138095 | AAATCTTCATGTGTATACAGGAGCCCTT  | AAAAAATAATATTCACGCCAGGCTTAC   |
| ENSE0000096265  | ENSE00000138095 | CTACCTGAGGCTCTGTTGAATGAAACCT  | CCCTTTTGGAAGAACTAATTTGAAAGAT  |
| ENSE0000096268  | ENSE00000138095 | CACGTATATAGGCCAGATAAAGGTGTTT  | CATCTTTTGGCATCTCAGATAATGTC    |
| ENSE0000096269  | ENSE00000138095 | CACAAAAGGCTGTGTATAAGCAGGTAAT  | CCATTTTATCTCGATCAGCAAGCATGCA  |
| ENSE0000096260  | ENSE00000138095 | TTTTTAAAGGGTGGTATCTGAGGCAATG  | AATGCATATAAGCAGGACAGGTCATA    |
| ENSE0000096264  | ENSE00000138095 | TCCTGTGCGTAACCTTTGTATTACCTT   | TGGAAATATTCAGTTTGATCACTTGTT   |
| ENSE0000096265  | ENSE00000138095 | ATTACTGCTCTTTGAGTGAAGACATAGAC | AGTGTGTTAACTCTGTTAATTTGCTGG   |
| ENSE0000106958  | ENSE00000138095 | TGATTTTAAACCTGTGGCCGACAGAG    | GGCTGTTTTGGTGAAAGAGTAAGATAGG  |
| ENSE0000115932  | ENSE00000138095 | TGCACCTTAGTGTCATGCTACTACCA    | GCCAGAAGATGTTTGAAGTCTATAGAT   |
| ENSE0000115932  | ENSE00000138095 | TCTAACCATCATATACACAGAAAATG    | AGATGTGTTTGTCTTGTTTGTTCTCT    |
| ENSE0000115933  | ENSE00000138095 | ATTGGATTCACAAACATAAAGACATG    | TGAAATATCATCTGCATACAGCAACAT   |
| ENSE0000115934  | ENSE00000138095 | TGCAATAAGTCAAAAGGACAGGAAATA   | CGTTAAAGGGTAGCTATATGTCAAGT    |
| ENSE0000115939  | ENSE00000138095 | ATGATAACCTTCTCTGTTCTATTCGCT   | GAAACAGGATCTTTGGCTTATCAAA     |
| ENSE0000115935  | ENSE00000138095 | GACCTTTTAGTGCTTCAGTCAATGAC    | GCCTTTAGACAACGAATGTGCTGAGTA   |
| ENSE0000128406  | ENSE00000138095 | AGTGTGTTTAACTCATGTTTGTGGCG    | GGATTTTCTCCAGTTGTTTGAATCGGA   |
| ENSE0000130307  | ENSE00000138095 | CCATGCTGCTGTAATTTTGTATTTTA    | TTGGTATGTGACTGTGATTTAGGTGTT   |
| ENSE0000134028  | ENSE00000138095 | CTTAACCTTCGTCACCCGAAATCC      | CTCATTCACCAATAAACCAATCCGTC    |
| ENSE0000094353  | ENSE00000140521 | CCCTACATAAAGCTGTGTCAGCTGTG    | TCGTGATTTGGGTTGAAGGCTGTGT     |
| ENSE0000094352  | ENSE00000140521 | CTCTTTTGTAACCTGACAGCCATGCCAC  | TTTAAATGCGCTGCATGCTTTGAGCTGT  |
| ENSE0000094358  | ENSE00000140521 | GAGAGAAAGAGAGAGAGAGAGGGGTGT   | GGACATCTGTGAGAGAGAGAACCTCC    |
| ENSE0000094353  | ENSE00000140521 | AAAGTAGTGAAGCAGGGGATGGGTAG    | GAGGACTAAACAAAGGGAATGTGGAA    |
| ENSE0000094358  | ENSE00000140521 | CAGCACCATTCTTTTACATACACAGG    | ATTGCTCAGACTGCTGAGGTTCT       |
| ENSE0000094354  | ENSE00000140521 | TCTTTAGCATCTCAAAGTAAACAAAC    | GAAGTAGATGTGAACATCTTGCTGCCA   |
| ENSE0000094350  | ENSE00000140521 | ATCATATCACATTCATCTGGACACAGG   | CTTACATAGTGAACAGATGGGGGTGT    |
| ENSE0000130316  | ENSE00000140521 | CTGCTGACTGGAGAGGAGGGGCG       | CTCTTAITGTTGCGGCTGGGAGTCT     |
| ENSE0000140815  | ENSE00000140521 | CAATGGCTTCTCTCTGTGATTTTGTG    | TTGAGCTCTCAGTACAGTTCTTGAGG    |
| ENSE0000098411  | ENSE00000148290 | TGGGATGTGTAAGAAATAAGTAGTATG   | TCTCTGTAAAGTTGGACTTGGCAGT     |
| ENSE0000100142  | ENSE00000151729 | GTCTGCTGGTCAATATGTGAAGAC      | AAGGAGCCCTGTAAATAGTCTCTCT     |
| ENSE0000100142  | ENSE00000151729 | GGACACATAACATGATGTGGCCCTTA    | CTCTAGCAGAGGCGACCTCTCTCCCC    |
| ENSE0000110406  | ENSE00000166548 | ATCCATTACAGGCTCTCAGTATCCATT   | TAGATCCCATAGGATCTCTTCCACAC    |
| ENSE0000110409  | ENSE00000166548 | TGCACTTTGGGCTCAAATATAGTCTC    | AATTATGCTGGTATGATGAGCCCTTC    |
| ENSE0000110409  | ENSE00000166548 | CCAAAGGCAAGTGCTCAACCTAGT      | GAATTGACATGCCAGAGAATTTCTCT    |
| ENSE0000110409  | ENSE00000166548 | AAGTTGTCAAACCTTAAAGGACTGTGCC  | CTCTGCTGACACCTTGTGATGTTG      |
| ENSE0000110402  | ENSE00000166548 | AATCATACATCCCAAGTGTGAAGAAAC   | TAGGTTTCTTGAGCTGTCTCTCAGTG    |
| ENSE0000110402  | ENSE00000166548 | CGGGATCTCCATATCTGTAATGAATA    | GTAACAGACATTTCTCAAGCCCTCTG    |
| ENSE0000110404  | ENSE00000166548 | AACCTGATTAAGAGCGCAGAGATGCT    | TACACATCTTTACAGGTTTCAGCAGCA   |
| ENSE0000110409  | ENSE00000166548 | CTCTGATACATCTGGTTTGTTCTCTC    | ACTGAAAGAGATGAAAGTGTGAGGCG    |
| ENSE0000114032  | ENSE00000166548 | CTCTGCTTTTCTCTCTCTCTTCAAC     | GCAAAITAGGCGACGAGGAGATTAIT    |
| ENSE0000111027  | ENSE00000167136 | GTCTCACTGGATATCTCAGCGCTGTC    | TGAGGGAACCTGGTATGTACCCAGAG    |
| ENSE00000145828 | ENSE00000167136 | ACAGAAAGTTAGAGGACATAGCAGGGA   | AGTGAAGCAGCAGTGAACCAACGAG     |
| ENSE0000111708  | ENSE00000167792 | GTAAAGGATGGCTGTACAGAGGAGAC    | CAGGTAATCAACCTCAGAACCACTGTG   |
| ENSE0000111708  | ENSE00000167792 | CGAGGATAGAAGATGATAGGGGATAT    | CTCTCTTTGGCAACCTTGCCC         |
| ENSE0000117082  | ENSE00000167792 | CGATTGAGAAGCATGTGTGAAGT       | AGTGTGTTGGAAGAGGTTTCTG        |
| ENSE0000118544  | ENSE00000167792 | AAGCAGATAGAAGGCCATACGATTTGT   | AGATGAGACCTGTCTCTTCTCTGG      |
| ENSE0000118547  | ENSE00000167792 | AAGGCATGGCTCTCAGTCTGCT        | TACAGACCCAGGAGCTGCTGT         |
| ENSE0000128362  | ENSE00000167792 | GGTTCATGACTCTGGAAGTTATAGGCT   | AAATCCCTAAGAACAATCCAAAGGAG    |
| ENSE0000096817  | ENSE00000168827 | CCCTCATCTCAAGTAAAGACAGAAACAA  | AGACAACTATGTGAAGAACAAATGATG   |
| ENSE0000096817  | ENSE00000168827 | TGGGTTCTTGTAATGATGATCTGCAAGT  | TTCTGAGGCTATGATGATCTAGGAAAA   |
| ENSE0000107705  | ENSE00000168827 | GTACCTTTGGGAAGCATCATTTTCT     | AAGCTCATCTGGATTTCTCTTATGTT    |
| ENSE0000126992  | ENSE00000168827 | ATGCCCAGTGAGACATTTATTTATCT    | TTCCAAATCTTTCATAAAGTCAG       |

TACAGGGCCCTAATCTGTGCATAGCTGTGTA  
 TGACATCAATAATTCCAAGAGTACTGAC  
 ATAAGCATGTTTGTTCCTCCATACGAA  
 CCATTTAGCTTTTGTGGTTTCTTCACTTA  
 CTTCATGATGACTTTTCTTGGGTTTT  
 AAAAAAATAATCTACGGCCAGGCTTAC  
 CCCTTTTGGTAAGAAGCTAATTTGAAGAG  
 CATCTTTTGGGCAATTTCAGAAATATG  
 CCAATTATATGCTATCAGGAAGCATGA  
 ATATGCTAAAGATCAGCAGAGCTATA  
 TGGAAATTAATCAGTTTGTACCACTTGT  
 AGTTGTTCTAAATCTCACTGTAATTTGGG  
 GCGTGTTTTGGTGTAAGAAGTAATGAAG  
 GCGAAGAAGATTTTGAAGTCTATAGAT  
 AGAATTGTGTTTGTCTTGTGTCTTCT  
 TGTAAATTCATCTGATACAGCAACCTAT  
 GCTTAAAGGCGTAGCTTATATGCAAG  
 GAAAAACAGGATTTTGGCTTATCAAAAT  
 GCCTTTTAGACAAACGAATGCTGAGTA  
 GGTATTTTTCCTGATGTTTGTGAATCTG  
 TTTGGTATGTACTGTAAATTTAGGTGTT  
 CATCTTCCAACTGAGGAATCCGCTG  
 TCTGATTTTGGGTGTGAAGGCTGTGT  
 ATTTAATGCGGTCTGCACTTTTGAGCTG  
 GGACATTTGTGAGAGAGAGAACCTTCC  
 GAGGACTAAACAAAGGGAATTTGTGGAAG  
 ATTTGCTCAGACTGCTGAGGTTCT  
 GAAGTGATATGTGAACATTTCTTGCCA  
 TTAGTCAATGACACAGATGAGGTGGTG  
 TCTCTATTTGGTGGCGTGGGAGTCT  
 TCTGAGATCTCAGTATACAGTTTCTTGAGG  
 TCTCTGTAAAGTTGGACTCTGGCAGT  
 AAGGAGCCCTGTAAATATTTCTCTCT  
 TCTACGAGAGGAGGCACTTCTTCCCC  
 TAGATGCCATAGGATCTTCTTCCACAC  
 AATATGTGCTGTTGATCAGTGCCCTTCT  
 GAATTGCATAGCCCGAAGTTTCTTCTCT  
 TCTCTGTTGGACACCTTGAGTAGTG  
 TAGGTTTCTTGAGCTGCTTCTCAGTGC  
 TGACAAGACATTTCTCAAGGCTCTCTG  
 TACACATTTTATCAGGTTTCAGCACAGA  
 ACTGAAGAAAGTAAGGTTGCTGAGCG  
 GCAAAATTAGGCGACGAGGAGAGTATTT  
 TAGGGAACTGTGATTTAGCCAGAGC  
 AGTGAAGCAGCATGGAACCAAGG  
 CAGGTTACAACTCAGAACCACTGTG  
 CTCTCTTTGGGACAGCTGCCC  
 AGTGTCCGAGAGAGGTTTCTG  
 AGATGAGACCTGTCTCTTCTCTGTG  
 TACAGACCCAGGAGTCTGCTGT  
 AATCTCCAAAGACATCCAAAGGGAG  
 AGACAATCATGTGAAGACAAGATATG  
 TCTGAGGTATGATCATCATCAGGAAAA  
 AAGCTAACCTGGATTTCTCTTATGTT  
 TTTCAAATCTTGATAAAGTCAGAGTCA  
 GAAACATTTCTGTGGTTGTTTCTGAG  
 ACCTTTGTGGATATAAGGTTTGTGCTTA  
 TAGAGGCAAAATAATCCCAAGAGTCA  
 GCATGAAGAACGAGGATGTATACAGCA  
 GGAATTGAGATAGATAGTAAAGAAAGCTCA  
 AGTATTCGGAGCTGTGAGTATGAGG  
 CAAATAATAACCAAAATTTGAGGAGGCT  
 CCTCCCTACAAAAAACCAAGGACTCTT  
 CGTTTGTAGTACATTAICTTTCTCTTCT  
 TCCAGCATAGTGAAGAAGAACCAATGTG  
 CGCTGTACCATTTTAAATCTTTACG  
 AATTCCTACAGATGCTATAAATCAGAAAGTA  
 GAAGTTCAGAGCAAGAGGCTCATACCT  
 ATTCCTACACTCAAAGATGAGACCAAGC  
 ATATTGGAACCTTTTCTCCCTATTCTG  
 GAGCAAAAAGTTCGGGGAAGAAAAAG  
 CAGAAATGACATAACATCTTGACATAGAG  
 AACACATATCTTCAGAAAGATGCAATCT  
 TTTGAGTATGAGTATGCTGAGTGTGCTG  
 GTTAATCATGATATCTCTCTACCTAAAC  
 GAGTCCGTCAGCTGTTTGAACAC  
 ATCAAGGAGTGTAAGAGGAGGAGCACT  
 GTGGATTTTGAAGATGAATTCAGTTTT  
 TCTCAGCATTTCTGTATGTTCAATGT  
 CAACCTTAAGAATCTCAATAAAAAAGGG  
 GTAGCGAGTACGGCTGGGCTTGAGC  
 CAGTGGGTCAGGCTGGGCTGGGC  
 GAGCGCTCTGCACCTAAACCCAG  
 AGTGTACCTCAGAAAGGAATGTGTGCT  
 GTAGATGTTGTGAGGTGCTTTGACAG  
 GTTATGTAACCACTCAGAGCTCAGCA  
 GTGTGTAATTTGAGTTTGTCTGCTGAG  
 TAGGAAGATGAGATGATGCTACAATA  
 TTTATGATGGAGGCGAGTGTATT  
 TGTCAAGTCACTGTTGTGCAATTTCTG  
 TAGTTGGAGGGGCTTCTGTGCTACT  
 ATGTCCAAATTCAGGATCAGAAAGAATTA  
 GACAGTCTGGGAGTTGAGTTTCCAGGT  
 TATTTGGCAGATAATAACTGCAAAAAAG  
 AGAGAAGTGCAGGTTCTCTCAGGT  
 CTTAGACCCGCGACCTTGGGATGAG  
 CTCTGAGGAGCCACAGGAGGAG  
 CTTCTCCGTTATTTACAGGAATGTGA  
 CTGAGGCGCTTCTTCTCTTCTCACT  
 TAGAGGAGCAGGTCCAGCTACACAG  
 GTCTGCGGGGAGAGGCTATTATTC  
 TAGTTTAAAGCAATGAGGCTATGTCAGC  
 GTGTGTTGGCGTGGCTGTGTGTG  
 TGTGTCATTTACAGAGATAAGAGCTCT  
 TTTGCTTCTTTTCTTCTGAGCTCTTG  
 CCTACACACAGATGAGCGCACTT  
 ACTCTCTTGGTCTGTGTGCTCTG  
 CTTAGGACCCTGTAGGCCACCTGT  
 TCTTGTCTCTGGAAGTGCACAC  
 TAAATTTGTTAAATGGAGCCTTGTA  
 AAGTCAGCAGAGAGACAGGACGCTC  
 CATAGCTACAGGGGACAGGAGC

|                          |                 |                                |                                |
|--------------------------|-----------------|--------------------------------|--------------------------------|
| ENSE00001278136          | ENSE00000196365 | CATAAGGCATCTCGTGGCTGTCTCC      | AGACAGCATCTCGCTAGCATGAAGAC     |
| ENSE00001278143          | ENSE00000196365 | CCAGAGGTGCAAGATGACAGATAGGAC    | CACAAGATAGGACATCTGTCTCAAAAA    |
| ENSE00001278189          | ENSE00000196365 | GCCTTCACTTGCCACACCGCATATG      | GAGGGTGCTAGTGTTGTCTGTGGT       |
| ENSE00001429886          | ENSE00000196365 | TCGAAACATCTCATGTCTGAAAAGTTG    | AGACATCGCATGTCTGCAACTG         |
| ENSE00000924370          | ENSE00000198836 | ATTTAACCTTGCTGTACATCTGTATAAAC  | CTGTGTGAAAAAACAGTTTGCATATCCACA |
| ENSE00000924371          | ENSE00000198836 | CAATGATTTCCCATCTGTTGTAAAGATAA  | GATGAACACACAACAGTGAACGGGTAAATA |
| ENSE00000924372          | ENSE00000198836 | CTGTACCGCTTTTATGTTTACGATGAAGAT | TTTGAAGAACTGAAGCTGTCTCTTTT     |
| ENSE00000924373          | ENSE00000198836 | AGTTTGTCTTGCTCTAATTTTCAATGTG   | AGGTCTCACTGAAGCAGTACTCTCTCTA   |
| ENSE00000924378          | ENSE00000198836 | CATTTAAAGTTTATATGCGTAGGATTTCT  | CTTTTGTGTAATTTGCTTTATCTCTTCA   |
| ENSE00000924381          | ENSE00000198836 | ATGAAGAATTAAGTGCTGTTTAGCAAG    | CAAGAATTCGCGATATAAAATGTCT      |
| ENSE00000924382          | ENSE00000198836 | AACATGAGGAAACATAGAACTGACGGAGAA | CTTTAGCTTTACAGATTTTCTTCTCAACAT |
| ENSE00000924383          | ENSE00000198836 | TTAAACCCAAATTCAGCTGACTGAAAAA   | GGCAACATAAATCACTGCTTTTCACTA    |
| ENSE00000924384          | ENSE00000198836 | TCATTAATCTGACTTGTCGGATTACAG    | ACAGCTCTCACTCCCTTGACATAAGT     |
| ENSE00000924385          | ENSE00000198836 | GCTTGAGCTGTGTTATTTTTCATGTA     | GGGAATAATTAAGGGCAGATTACAGATCA  |
| ENSE00000924386          | ENSE00000198836 | ATAGCAAGTCAACAAATAGCAGGCCAA    | TAAAGTTGGATGACTCTTCCACCACTG    |
| ENSE00000924387          | ENSE00000198836 | GGGTTTTTCTTATTTTAACTAGCTTCT    | CCACAAAAAGGCTATAITTTATGCTGCTA  |
| ENSE00000968963          | ENSE00000198836 | CTGTTTGTGAGGTTGTACATGAGGATTA   | CCATGTAITTTTCTTCACTGGTTTCTAAA  |
| ENSE00000968964          | ENSE00000198836 | AATTGAAATTCAGTTAGGCTGTGTGAC    | GAGTGTITTTTGTCTTTGCTTCAGATGT   |
| ENSE00000968966          | ENSE00000198836 | CAGTGTGGTTGATCAACATGAAGAAT     | TCCCAAGATGATCAAAAGGACTTAAAT    |
| ENSE00000968967          | ENSE00000198836 | TGTGACAGCATATAAGCCAAATATGACG   | GGGAAGTATTTTGGCATCTCTTATATAA   |
| ENSE00000968968          | ENSE00000198836 | CTCTGACATATAATGATTTCTCATGTGAT  | ACACAAACATGAAGTATGGGAAGAGT     |
| ENSE00001149527          | ENSE00000198836 | ATAGGCCATTTACCATATTTCAATAGCCG  | AACAGTCAACAAAAGTCAAATTAAGCACT  |
| ENSE00001190570          | ENSE00000198836 | GACATCTTTGTTTGTCTATTTCTGTAA    | GCAGCATATAAATTTTGTCTGCAATTT    |
| ENSE00001190660          | ENSE00000198836 | AAGGGATGACGCGCTTTAAATGAGTGT    | TATTTTGGCTTCATGAACAGATGAGGT    |
| ENSE00001190696          | ENSE00000198836 | CTATTTGTGACATATTTGTTAGTACAG    | TCCAATTTGATTTCTTCAACAAAAATGAT  |
| ENSE00001267455          | ENSE00000198836 | CTTGTGTTGTGACCCATTAAGTTTGT     | TTCAATTTCTTCTCTCGATGATGCC      |
| ENSE00001358924          | ENSE00000198836 | TAGAAAGGGTGAAGGGTTGTTTCCGTG    | ATAGAGATAAGACAGCCCACTCTCAAG    |
| ENSE00000343040-0343039  | ENSE00000005156 | AGCAGAAATGTTACACATGAGGTTCTTG   | ATAGGAGACACACAAAGCGCTTCCAG     |
| ENSE000008087593-0887592 | ENSE00000005156 | GGGTGTGATATCTCCCTCATTTACAGAA   | GCACTAGAGAACCTGCAAGCTAATTCATG  |
| ENSE00001106051-1106042  | ENSE00000005156 | GTTGAGTGGGATAGGAGTATGATGTA     | GTTGGGAACAAACAAAGTCAACAAATG    |
| ENSE00001160861_1        | ENSE00000005156 | TTCCAGTAACTCTCTGCTTGTGTCTCT    | GTTTCTCAAGAAACAAACAAAGATGGC    |
| ENSE00001160861_2        | ENSE00000005156 | CTCAGGCCATATCTCTTTACCATAT      | ATTTTCTCACTGACCTTGGCCCTC       |
| ENSE00001220019-0713836  | ENSE00000005156 | GCAATCCTCATCTCTTGTGTTCTTGT     | ATGTAACAGGGAAAGAGGCTCTCTAG     |
| ENSE00000808465-0809463  | ENSE00000021574 | AATCTCTTATACTAGCTATAATGCCAAAT  | ACTCATATGATTTCTAGTAACAGTACCT   |
| ENSE00000809472-0809470  | ENSE00000021574 | GTACTCTCCCTTTCTCAACAACTATCT    | CGACAGTCTGACTCAACAGAAAAATCT    |
| ENSE00001006576          | ENSE00000021574 | ATCATTTGATCTTGGTTTGTGCCCTCAAC  | AAAAAACACACACACACACTATCA       |
| ENSE00001144419_1        | ENSE00000021574 | AACGTGCAATTTGGGAATGTGTTGAGT    | TATAGAAATATGATCAGAGTTCCGCTAT   |
| ENSE00001144419_2        | ENSE00000021574 | GGACGGGGAAGAAGAAAGCGCTCC       | ATATAAGAAGTGAAGGCTCGCACCTAG    |
| ENSE00001480636_1        | ENSE00000021574 | ACTTTTATCCATCATTTCTGTAACCC     | GGCACACTGAATTTATAAACGAAAAAGA   |
| ENSE00001480636_2        | ENSE00000021574 | GGAACAGTGAATGTGTAAGAACACAAAG   | AGCAGAGGAATATGAAAAATGTATGCCA   |
| ENSE00001480636_3        | ENSE00000021574 | GTGAAATGTTTCCGATGACAGAGAGT     | CAAGAGCCCAACTTGTTCTTAATATG     |
| ENSE00001480636_4        | ENSE00000021574 | AACTTTCTCTTGCTGTTTAAATGAGT     | GCTGAGACCAAGTCTTCTTAATATG      |
| ENSE00001480636_5        | ENSE00000021574 | AGCCAGAGCATGATCATTTAGTGATGT    | CCATATTAACATGAAGACAGCAATAATG   |
| ENSE00001480636_6        | ENSE00000021574 | TAAGGGATTTGGTTGGTTTCTTAATA     | CTTCATTTACAGTCAACCCCTAAATG     |
| ENSE0000078498-0784947   | ENSE00000023228 | CCAAATGAGGTGATCATGATCTTCTTACC  | GGTTTTCATGATGTCGATATTTAC       |
| ENSE00000657754-0878931  | ENSE00000025708 | GTCACGTGTTTCATCGACAGCGC        | CTCTCTCCGAGGAGCCGCCCTT         |
| ENSE00000657757-0657756  | ENSE00000025708 | CCTCGGGGAGGAGGGGTGAGAG         | ATCTCTCCCTGACTCATGTGCG         |
| ENSE00000657759-0878932  | ENSE00000025708 | CTTAAGGTCACAGCAGGTGTGAAGCGG    | AACAGAGGAGTCTTTCACAGAAAAA      |
| ENSE0000135606-0878933   | ENSE00000025708 | GAGGTCTCTCCAGATCATGCC          | GACTCGCGAGTCTCGCCCTCCAGG       |
| ENSE00001443673_1        | ENSE00000029639 | TGGGGAAGTCTGTGATTAATGTTTCAA    | GAGGATGACGAGGAGATTAACAGACTG    |
| ENSE00001443673_2        | ENSE00000029639 | AGGAAATAAGTACATCTGGTTCATGTC    | GGTTAAAGTCTGTATGTTTTCAGAAIT    |
| ENSE00000873725-0873724  | ENSE00000060507 | TCCTTGAGTACATGAACAAATGTGTA     | CAATGTCTAATCGTGGAGGCCAC        |
| ENSE00001162403          | ENSE00000060507 |                                |                                |

|                          |                 |                                |                                |
|--------------------------|-----------------|--------------------------------|--------------------------------|
| ENSE00001078306-073133   | ENSG00000115204 | TTGAAATGAGAATCATTTTGTCTCCAAC   | CTGTGTGTGACATTATACTGGGGAAGTG   |
| ENSE00001078308-1078307  | ENSG00000115204 | TTACCCCTTTTTTATCCCTGTAAAAACC   | GTCCACTTCCCCTATTCTGTATACTTGG   |
| ENSE00001483537          | ENSG00000115204 | GGAAACCAAGTTTGTAACTTCTGAGTC    | CTGGAAGGGGTCTCTCACAGAGT        |
| ENSE00001191811_1        | ENSG00000122971 | CTCTGACTGTACCCCACTGTTTAGGAG    | AACTGAGGTGTCCTCTGAGTGTCCG      |
| ENSE00001191811_2        | ENSG00000122971 | AGATCAGATCACATGGGAATGAGGC      | ACTCTGTGCAGAGAACCACTCCCT       |
| ENSE00001245827-1191782  | ENSG00000122971 | AGGTAATGGTGGCAGCTTTTAGGAGC     | AGAACAGTGGCTCAGGAGGGAGAAGAC    |
| ENSE00001245837-1245843  | ENSG00000122971 | ACCTATTTTGTCTCTGGGCAAGT        | AGCAGTCAGGAGGCCACACTCTC        |
| ENSE00001245859-1191801  | ENSG00000122971 | TTGAAATGAGAAGTGCCATCATATAGACC  | CTAGCACCTTCTCTCTCCCTCTTGG      |
| ENSE00000750748-1479920  | ENSG00000123297 | ATGAAATGTGTCTCTCAAGAAATCAAG    | AGAGCAGTCTAACTTTATGCTCCCCAG    |
| ENSE00001245683          | ENSG00000123297 | ACGCTCTGGCCAATACTTTTCTTAGAGAT  | GAACAAGATAACAAGAGATCCAGTCCCTA  |
| ENSE00001479917_1        | ENSG00000123297 | GTAATGCAAAAGGGAGTGTCTTCCAAC    | TAATAATTTTACCATTGCATCTCGGTCT   |
| ENSE00001479917_2        | ENSG00000123297 | GTAGTAGACTTTTGTGCGGTTTGAATGTG  | ATCCAAAAGAGAAATAGGGGCACTGTT    |
| ENSE00001479917_3        | ENSG00000123297 | CAAACTAGAGTTGTCTGGAATGTGG      | GGAGAAATCAAAAGAAAGAGAACCAAAAA  |
| ENSE00001141269-1424973  | ENSG00000132781 | CTACTCAGGAAGCTGAGGCAGGAGAAAT   | AGTAACAAGAGAGAATGGAGGGAATCGG   |
| ENSE00001141279-0905974  | ENSG00000132781 | CGATTCCCTCCATTCTCTTGTGA        | GGGGCAGTGAGAAGTCTAAGGAGTGAC    |
| ENSE00001141291-1141285  | ENSG00000132781 | GAGTGTCTAGAGGCAGAGTCACTCCTT    | AATCAGGTGGTAGAGGAGCTAGGGGG     |
| ENSE00001141306-1141299  | ENSG00000132781 | TTGTTACCCCAACATCTACCAGAGC      | AAATAGGAACAATAGAGGGACTGACGG    |
| ENSE00001141319-1141314  | ENSG00000132781 | GGTAGAGTCAGAGGTCAAGAGAGTACCC   | GTACATCTCTGAGAGCAGGGCCACTTT    |
| ENSE00001212332-1141324  | ENSG00000132781 | ATCCGGTATAGTAGTTGATCACAGTGGC   | AGCTCCAAGCTTAAGGGGGTTAGTT      |
| ENSE00001456906-1141257  | ENSG00000132781 | GAGAATGTTCACCCAGACATTCGTATGT   | TACCACACCCAGCCATGATTTTTTGTAT   |
| ENSE00001456928-114521   | ENSG00000132781 | CGACCTCTCCTAGTCTAACTCTCGTG     | GTCTGTGGGTACGCTGGACTTGC        |
| ENSE00001456950          | ENSG00000132781 | GCTCGACGCAAGTTCGACCCAT         | GTATGAGCTCCAGACTACATCTCCCCG    |
| ENSE00001478202-1478196  | ENSG00000136143 | AGAGTCTCTTGGTGAATTGCAAAAATCT   | CCTAAATGAAAGACCAATTTGACTATTTGA |
| ENSE00001478261_1        | ENSG00000136143 | TGGCAAGTATATGATCAAGAATTGGTGC   | CGTAACCTTGCAATTGGCCAGTTTATTAIT |
| ENSE00001478261_2        | ENSG00000136143 | TTCGTAGGAGTGTGTGAAGCTGTGTTT    | GCAGTACCTGTAGTTCTGAATTTACCT    |
| ENSE00000925350-0925351  | ENSG00000136480 | GAGCCCAACAATGTTTTTACCAAAAGTA   | CAAAAATGATTTGGGTTTGTGGACTA     |
| ENSE00001379085_1        | ENSG00000136480 | CAGGGGTAGAGCACTGTTAATATATCCG   | GAAAGGAGTAGCCCAAGGAGGG         |
| ENSE00001379085_2        | ENSG00000136480 | CAGAACTAACCTGAAGGCATGTCC       | AAAGAAAAAGTCAATCTGAAGGGAGGG    |
| ENSE00000932582-0932581  | ENSG00000138095 | TCATTTAATGCATTTCTTACAAGCTGTA   | TTGCTGATGATTTTACGTGTGTTTTC     |
| ENSE00000932591-0932590  | ENSG00000138095 | AATTAGATGTGCGTCAAACTGTCTATAC   | TAGAATATTGACAGCAGGTCAACCGGT    |
| ENSE00000932597-0932596  | ENSG00000138095 | CAGTTCGAAACAATTTCTCCATTAGG     | TAGTCCACTTTAAAGCATAGGATTTTC    |
| ENSE00000962636-0962637  | ENSG00000138095 | AATGTTTTCGTTAAAGTATGGAAGGGGA   | GGAATAATGCTTCTTCAACATCAATAAG   |
| ENSE00000962641-0962642  | ENSG00000138095 | TCTATCTCCACCAACGCCTATGTCTA     | GGTTTCAGTTCGCTAGTGTTAATTGGTT   |
| ENSE00001069565_1        | ENSG00000138095 | CCTCATCTCCAGTTAGGTCAATATCCA    | TTCCCTGCTCTGTCTCATTTATTTCAITA  |
| ENSE00001069565_2        | ENSG00000138095 | CTGTAGCTCTCTAGTGCCAACATTTAAC   | AAGTTATGTACCACTACCTCTGCTGG     |
| ENSE00001159316-1159309  | ENSG00000138095 | AATGAAAAAGCTTCGTTTAAATGGCTGT   | AATCTTGATAACATGACAGTCTCGGTAA   |
| ENSE00000943530_1        | ENSG00000140521 | CCACATAAACAGGGGCTAGTCTCTAAT    | AGCAGCCGCAAGTGTATCTCCG         |
| ENSE00000943530_2        | ENSG00000140521 | CTGTGCCAGGTTGTCCCGTAGAG        | TCAAGGAATGATGATTATGGATACACCTAT |
| ENSE00000943531          | ENSG00000140521 | AAAGGAGTACCTCCCTTAACCACTGA     | TTGTTGTGGAGTGGAAAGTTAATGTCTC   |
| ENSE00000943533-0943534  | ENSG00000140521 | TTCTTTCAGCCTAGAAAAGTCAAGGTCC   | ATAGTGCTTGGGACCCCTCTCAC        |
| ENSE00000943536-0943537  | ENSG00000140521 | CAAAATGAGAATAGGACTGGAAAGACAGTG | CTCTCTCAGGAGAGAGGTAGCCAG       |
| ENSE00000943540-0943541  | ENSG00000140521 | TAGTCATTCCCAACAAAAGGAAAGTCTC   | GTGTCTGAGTACCATGACAGGGAGG      |
| ENSE00000943543-0943544  | ENSG00000140521 | TGTCGCCAGAACATATTTACTGAAGGAGT  | TAATGGAGTATAGCAGTCTGGAGGTGG    |
| ENSE00000943545-0943546  | ENSG00000140521 | AGTTCAGTAATGGGCAGGAGATAGAAC    | TAGCTCTTTCTCAGTCAACTCTGGCTC    |
| ENSE00000943548-0943549  | ENSG00000140521 | TCTAGGGGGATGAAAAGTCAAAACTG     | GCTTTGTTTTTTATGCTTTGAGATGCTGA  |
| ENSE00000984111-0984112  | ENSG00000148290 | AGCCCAACAGATGACTGATAATGAGAG    | CAGTACTGGAGTCTGTCTTGGAAACGG    |
| ENSE00000984114-0984115  | ENSG00000148290 | AGTACTTGCCTAGGTTCTTTGCTGAGTT   | TGAGTGACTGTCTTTAGTCAAAAACCTT   |
| ENSE00000984116-1456594  | ENSG00000148290 | CCACCCCTTAAATACATTTTAAACCAGG   | GTAAGGGCCATACAGGACTTCCAACCTG   |
| ENSE00001456605-0984110  | ENSG00000148290 | AGCATTTTAAATACGGAACATGTCTACTCT | CTCGCAGAACCTGGAGCCGGGGG        |
| ENSE00001001421          | ENSG00000151729 | GTGTGTCAGATATGTTTTCAGGGGAAAAA  | TAGAAGCTTGGCTGCTGACTGATACAT    |
| ENSE00001328829          | ENSG00000166548 | TCTTCATCCAGAACCAAGCCGA         | TACCTAATCTCTGAGGACAAGCTCGGA    |
| ENSE00001329349_1        | ENSG00000166548 | TAATCCTTTCCAGGGTTTGCATCTAGT    | ACTTCCAAAAATATGCTGCATTTTG      |
| ENSE00001329349_2        | ENSG00000166548 | CACAGACTTTTCAGTAATTCGAAGCAAA   | TTTGCTAGTGTCTTTGCTATGCGTCTCT   |
| ENSE00001329349_3        | ENSG00000166548 | AACTTTCTGAGCTTCAAACTCTCATC     | CTTTTATCTGCTGCAACCTTCTGTG      |
| ENSE00001458291_1        | ENSG00000167136 | AGATAAAAGCTTTTCGACAGTGTCTGACC  | CACGTACGACTCGGGCTCTTGA         |
| ENSE00001458291_2        | ENSG00000167136 | CTCTTTTAAAGGCCTCGCGGGTCCG      | TCTGCAGAAAGACAAACCGAGGCC       |
| ENSE00001170831-117088   | ENSG00000167792 | GAGGAAGGCTGCTCTGAGGAGATAA      | AAACAGAGTCCAAAATCCCCAACAC      |
| ENSE0000117084-1283609   | ENSG00000167792 | CAAAAGAGCAAGAGTCTGTCTCAAAAAA   | TAAGTTTCTAAGGAAAGAGCCCAAGGC    |
| ENSE0000126987-1270109_1 | ENSG00000168827 | AAAGGAATTAATGGCTAAATGCGTCT     | CCAATCAATAGAGTTGAGATAGACATAGAA |
| ENSE0000126987-1270109_2 | ENSG00000168827 | ACTTCTGTGTAAAAAGGAAAAGCCAAG    | CAGAAACCAAACTGAAATAAACAGACACA  |
| ENSE0000126987-1270109_3 | ENSG00000168827 | GAATCGCATATATCATGACACTTCTTGG   | TTTTAAAGATCTTTTCCCTAGAAACC     |
| ENSE00001493945-1269936  | ENSG00000168827 | ATACTTGGAGGGAGTTATGAAGCTTTCC   | AACTTGGCCCTTGAGAAAATATAGC      |
| ENSE00001138109          | ENSG00000169188 | AGATATGAAAGGCAGCAAGTTTGTGGTA   | TAAGAAATAGTATTGCAAGCCAAGTCCG   |
| ENSE00001465324_1        | ENSG00000169188 | ATCAGTAAGGATGAAAATCAGAAATCCCA  | CTAGGCAGCTCTATGTACAGGAGAGGCTT  |
| ENSE00001465324_2        | ENSG00000169188 | TCTAGTTCTCTCTCGAACAAAGTCTCG    | AACAAGGAGCTAGGTAGGAAGGAAAGC    |
| ENSE00001465324_3        | ENSG00000169188 | GTACTGTGAAGAAGCCAGGACCCAACCT   | GATACTACTTCTAAGGAGGCAATCGTCC   |
| ENSE00001465324_4        | ENSG00000169188 | AAAGGGTTCTCTGCTCAGTTGAGGAAT    | TCTTCTCAATCCATATCTCTCTCC       |
| ENSE00001465324_5        | ENSG00000169188 | CTGTAATCCAAGTACTTAGGAGGCTGA    | GTCTTCTGCTTTGTGTGCTCTTACG      |
| ENSE00001126569-1126560  | ENSG00000171497 | TGAACAAACATCTAAATCTGGCAAAAGT   | TAGGCAATGAATTGAAATCTGGCATATAA  |
| ENSE00001126597-1126587  | ENSG00000171497 | CAACACACCTGGTTATTTCCAAGTAAT    | TGCACATGACTTCAGCTGTATAGCTTTTAT |
| ENSE00001170868_1        | ENSG00000171497 | CTAAAAACTTTATGATCTGGCCCTTGC    | TTTGTTTTCTTTGAGATGGAGTCTTGCT   |
| ENSE00001170868_2        | ENSG00000171497 | CTAAAAATACAAAATTAGCTGGGCGTG    | ACTTTGTAGAGAAGTTTCTTCAAGGGGT   |
| ENSE00001168868-1168860  | ENSG00000171865 | CAAGAAATAAGCATGTGGAAACATCA     | TCGTTATCCATTAGAAGAATCACTTTGA   |
| ENSE00001253775_1        | ENSG00000171865 | GTGGACACAAAGGTATTCACTTTACAA    | ATTTACCCTCCAGTTGACAGGTTTGAGT   |
| ENSE00001253775_2        | ENSG00000171865 | TTTATGCTTCTTGGTCTTTATGATGTCG   | CTGTTCTGAATGGTTTTTTATGATGACAA  |
| ENSE00001223953_1        | ENSG00000177192 | CTTATAGAGCACTGCACCTGTCCCTC     | ACTTCTCGAAGTGACCCCTTCCAGGAC    |
| ENSE00001223953_2        | ENSG00000177192 | GTACTACCTCGGAGATGTACTGCGAG     | CTCTGTACAATGGGAACAATGTGGG      |
| ENSE00001223961          | ENSG00000177192 | TAGTCCTTCTTCTCAGAGACACAGC      | GTGTCTCTGCAAGACCATCAACAAC      |
| ENSE00001330883          | ENSG00000177192 | CTGTTTAAAGAGAATGACCGAGAACAAAC  | GTGCTCATCTCTGTGGACGAAAAAA      |
| ENSE00001281407_1        | ENSG00000177302 | AAGTGATCAAGTGAGGAAAAGTGAGGGTG  | AAAGCAATTCGTGACCTGCAACTGTG     |
| ENSE00001281407_2        | ENSG00000177302 | GTCTATATGCCAAGGCAGGAGGC        | CTAAGGAGAAGCTGGCATCTGGTTGT     |
| ENSE00001281439-1281433  | ENSG00000177302 | AAAGAAAAGGGGTATGTGGAAAACCTC    | AAATGAAGGCATCTTACCTGCATAGGCT   |
| ENSE00001281452-1281446  | ENSG00000177302 | TAGCAGCTGCATTAGAGAATGGTTTGA    | GCTCTGTCTCTGAGAGGTGATATCTTA    |
| ENSE00001281490-1281484  | ENSG00000177302 | CTTCCCTTTTCTTTTATGCTGTCTCTC    | AGCCCTGGACTCTCATATCCATCAIT     |
| ENSE00001281545_1        | ENSG00000177302 | AGAGACAAGGTCTAACTATGTGCCCAG    | GCTGTTAGCAGAGGATTTGGTGCAGTC    |
| ENSE00001281545_2        | ENSG00000177302 | TGAAGTCTTCTCTGAAGGATCAGTGTTA   | CTAAAGTGCTGGGATACAGGCATGAG     |
| ENSE00001304637-1327107  | ENSG00000184428 | TTTATCTACAATCTCTGCTCCGCAC      | CTTGTGCTGTGGTTTAAAGACGCTGG     |
| ENSE00001305900-1326407  | ENSG00000184428 | CACCCGAGGCTCACTCAACAAG         | GTCTCACTGGATTGGGTTTTTTT        |
| ENSE00000951714-1158972  | ENSG00000196365 | AAGCGTCTGGTGTGTCTCTCACG        | CCAGCCCTGACCTGGGGTCTCCCCACT    |
| ENSE00001158952-1158945  | ENSG00000196365 | AGGCTCAGAATGTCTCCACAAGACT      | CTAAACTGGGGCAGGAGCGGTACAGGTG   |
| ENSE00001158962-1158957  | ENSG00000196365 | CTTGTCTCGGGTAGAAATGGGAA        | GTCTAGACTGAGCTGGTGGGCAAGGTC    |
| ENSE00000924375-0924374  | ENSG00000198836 | AGTAGTGTGAAGGGAAGTCTGGATTTGT   | GATAGCAGCAATCTAAACATCAATACCT   |
| ENSE00000924377-0924376  | ENSG00000198836 | ACCATTTTTGTGAGCGTCTTATCTGAAT   | AGCTTGGATTGTCAAAGAAGAAAAACATA  |
| ENSE00000924380-0924379  | ENSG00000198836 | GGTTTTCGATACGTGTGTTTAAAT       | CAGTTCAATTTAAGCTACTCTCTACTGT   |
| ENSE00001267213_1        | ENSG00000198836 | TTATGCCAATATTGTATAGTTCGGTGATA  | TAGGTAAGCTGGTACTGACTTGGCTTCC   |
| ENSE00001267213_2        | ENSG00000198836 | TCTTAATCCCAAGAACTATTTGACCATGA  | AAACAATAAAATGGGGATAGCAATGG     |
| ENSE00001267213_3        | ENSG00000198836 | AAATGTCTATCTCAITTTGCTGCTTTTTC  | TCAGGACTCTCATGTGGGACTTTTATGAT  |
| ENSE00001267213_4        | ENSG00000198836 | GAAAGAAAGACCTTCAGCTGTAATTCGA   | CAGAAAGAAGTCTCGGGAACCAACTGT    |
| ENSE00001267213_5        | ENSG00000198836 | ATCCAAACTTAAITGGCTAGGACTTCA    | ACAGGTTTCTCTTCCCTGTTAAACA      |
| ENSE00001306402          | ENSG00000198836 | GACTCATATTTTCTTTTCCCGCAAT      | AGCAGGATGTAATGAAGCAGATGATAA    |
| ENSE00001437809          | ENSG00000199916 | CAGGTGAAAATCCGTCTCTACAAAAAT    | CAACTTCTCACCTAATCATAAAAACAA    |

| Sample Coverage  | A1 | A2 | A3 | A4 | A5 | A6 | A7 | A8  | A9 | A10 | A11 | A12 | A13 | A14 | A15 | A16 | SUM of A | Avg of Each A | Min A | max A | Count=0 | % no coverage | count=1 | % =1 | count>=1 | % =1  | count>=10 | % =10 | count>=20 | % =20 |
|------------------|----|----|----|----|----|----|----|-----|----|-----|-----|-----|-----|-----|-----|-----|----------|---------------|-------|-------|---------|---------------|---------|------|----------|-------|-----------|-------|-----------|-------|
| ENR000004935: 42 | 32 | 2  | 1  | 25 | 46 | 17 | 2  | 128 | 77 | 9   | 108 | 165 | 14  | 25  | 82  | 673 | 48.3125  | 1             | 85    | 0     | 0       | 0             | 1       | 6.25 | 15       | 93.75 | 12        | 75    | 10        | 67.5  |
| ENR000010011: 30 | 16 | 22 | 31 | 8  | 26 | 21 | 27 | 58  | 79 | 50  | 54  | 80  | 77  | 22  | 40  | 701 | 49.375   | 10            | 78    | 0     | 0       | 0             | 1       | 6.25 | 16       | 100   | 10        | 62.5  | 14        | 87.5  |
| ENR000004936: 30 | 16 | 22 | 31 | 8  | 26 | 21 | 27 | 58  | 79 | 50  | 54  | 80  | 77  | 22  | 40  | 701 | 49.375   | 10            | 78    | 0     | 0       | 0             | 1       | 6.25 | 16       | 100   | 10        | 62.5  | 14        | 87.5  |
| ENR000010012: 30 | 16 | 22 | 31 | 8  | 26 | 21 | 27 | 58  | 79 | 50  | 54  | 80  | 77  | 22  | 40  | 701 | 49.375   | 10            | 78    | 0     | 0       | 0             | 1       | 6.25 | 16       | 100   | 10        | 62.5  | 14        | 87.5  |
| ENR000011127: 5  | 0  | 0  | 0  | 0  | 0  | 0  | 0  | 0   | 0  | 0   | 0   | 0   | 0   | 0   | 0   | 0   | 0        | 0             | 0     | 0     | 0       | 0             | 0       | 0    | 0        | 0     | 0         | 0     | 0         | 0     |
| ENR000011128: 5  | 0  | 0  | 0  | 0  | 0  | 0  | 0  | 0   | 0  | 0   | 0   | 0   | 0   | 0   | 0   | 0   | 0        | 0             | 0     | 0     | 0       | 0             | 0       | 0    | 0        | 0     | 0         | 0     | 0         | 0     |
| ENR000011129: 5  | 0  | 0  | 0  | 0  | 0  | 0  | 0  | 0   | 0  | 0   | 0   | 0   | 0   | 0   | 0   | 0   | 0        | 0             | 0     | 0     | 0       | 0             | 0       | 0    | 0        | 0     | 0         | 0     | 0         | 0     |
| ENR000011130: 5  | 0  | 0  | 0  | 0  | 0  | 0  | 0  | 0   | 0  | 0   | 0   | 0   | 0   | 0   | 0   | 0   | 0        | 0             | 0     | 0     | 0       | 0             | 0       | 0    | 0        | 0     | 0         | 0     | 0         | 0     |
| ENR000011131: 5  | 0  | 0  | 0  | 0  | 0  | 0  | 0  | 0   | 0  | 0   | 0   | 0   | 0   | 0   | 0   | 0   | 0        | 0             | 0     | 0     | 0       | 0             | 0       | 0    | 0        | 0     | 0         | 0     | 0         | 0     |
| ENR000011132: 5  | 0  | 0  | 0  | 0  | 0  | 0  | 0  | 0   | 0  | 0   | 0   | 0   | 0   | 0   | 0   | 0   | 0        | 0             | 0     | 0     | 0       | 0             | 0       | 0    | 0        | 0     | 0         | 0     | 0         | 0     |
| ENR000011133: 5  | 0  | 0  | 0  | 0  | 0  | 0  | 0  | 0   | 0  | 0   | 0   | 0   | 0   | 0   | 0   | 0   | 0        | 0             | 0     | 0     | 0       | 0             | 0       | 0    | 0        | 0     | 0         | 0     | 0         | 0     |
| ENR000011134: 5  | 0  | 0  | 0  | 0  | 0  | 0  | 0  | 0   | 0  | 0   | 0   | 0   | 0   | 0   | 0   | 0   | 0        | 0             | 0     | 0     | 0       | 0             | 0       | 0    | 0        | 0     | 0         | 0     | 0         | 0     |
| ENR000011135: 5  | 0  | 0  | 0  | 0  | 0  | 0  | 0  | 0   | 0  | 0   | 0   | 0   | 0   | 0   | 0   | 0   | 0        | 0             | 0     | 0     | 0       | 0             | 0       | 0    | 0        | 0     | 0         | 0     | 0         | 0     |
| ENR000011136: 5  | 0  | 0  | 0  | 0  | 0  | 0  | 0  | 0   | 0  | 0   | 0   | 0   | 0   | 0   | 0   | 0   | 0        | 0             | 0     | 0     | 0       | 0             | 0       | 0    | 0        | 0     | 0         | 0     | 0         | 0     |
| ENR000011137: 5  | 0  | 0  | 0  | 0  | 0  | 0  | 0  | 0   | 0  | 0   | 0   | 0   | 0   | 0   | 0   | 0   | 0        | 0             | 0     | 0     | 0       | 0             | 0       | 0    | 0        | 0     | 0         | 0     | 0         | 0     |
| ENR000011138: 5  | 0  | 0  | 0  | 0  | 0  | 0  | 0  | 0   | 0  | 0   | 0   | 0   | 0   | 0   | 0   | 0   | 0        | 0             | 0     | 0     | 0       | 0             | 0       | 0    | 0        | 0     | 0         | 0     | 0         | 0     |
| ENR000011139: 5  | 0  | 0  | 0  | 0  | 0  | 0  | 0  | 0   | 0  | 0   | 0   | 0   | 0   | 0   | 0   | 0   | 0        | 0             | 0     | 0     | 0       | 0             | 0       | 0    | 0        | 0     | 0         | 0     | 0         | 0     |
| ENR000011140: 5  | 0  | 0  | 0  | 0  | 0  | 0  | 0  | 0   | 0  | 0   | 0   | 0   | 0   | 0   | 0   | 0   | 0        | 0             | 0     | 0     | 0       | 0             | 0       | 0    | 0        | 0     | 0         | 0     | 0         | 0     |
| ENR000011141: 5  | 0  | 0  | 0  | 0  | 0  | 0  | 0  | 0   | 0  | 0   | 0   | 0   | 0   | 0   | 0   | 0   | 0        | 0             | 0     | 0     | 0       | 0             | 0       | 0    | 0        | 0     | 0         | 0     | 0         | 0     |
| ENR000011142: 5  | 0  | 0  | 0  | 0  | 0  | 0  | 0  | 0   | 0  | 0   | 0   | 0   | 0   | 0   | 0   | 0   | 0        | 0             | 0     | 0     | 0       | 0             | 0       | 0    | 0        | 0     | 0         | 0     | 0         | 0     |
| ENR000011143: 5  | 0  | 0  | 0  | 0  | 0  | 0  | 0  | 0   | 0  | 0   | 0   | 0   | 0   | 0   | 0   | 0   | 0        | 0             | 0     | 0     | 0       | 0             | 0       | 0    | 0        | 0     | 0         | 0     | 0         | 0     |
| ENR000011144: 5  | 0  | 0  | 0  | 0  | 0  | 0  | 0  | 0   | 0  | 0   | 0   | 0   | 0   | 0   | 0   | 0   | 0        | 0             | 0     | 0     | 0       | 0             | 0       | 0    | 0        | 0     | 0         | 0     | 0         | 0     |
| ENR000011145: 5  | 0  | 0  | 0  | 0  | 0  | 0  | 0  | 0   | 0  | 0   | 0   | 0   | 0   | 0   | 0   | 0   | 0        | 0             | 0     | 0     | 0       | 0             | 0       | 0    | 0        | 0     | 0         | 0     | 0         | 0     |
| ENR000011146: 5  | 0  | 0  | 0  | 0  | 0  | 0  | 0  | 0   | 0  | 0   | 0   | 0   | 0   | 0   | 0   | 0   | 0        | 0             | 0     | 0     | 0       | 0             | 0       | 0    | 0        | 0     | 0         | 0     | 0         | 0     |
| ENR000011147: 5  | 0  | 0  | 0  | 0  | 0  | 0  | 0  | 0   | 0  | 0   | 0   | 0   | 0   | 0   | 0   | 0   | 0        | 0             | 0     | 0     | 0       | 0             | 0       | 0    | 0        | 0     | 0         | 0     | 0         | 0     |
| ENR000011148: 5  | 0  | 0  | 0  | 0  | 0  | 0  | 0  | 0   | 0  | 0   | 0   | 0   | 0   | 0   | 0   | 0   | 0        | 0             | 0     | 0     | 0       | 0             | 0       | 0    | 0        | 0     | 0         | 0     | 0         | 0     |
| ENR000011149: 5  | 0  | 0  | 0  | 0  | 0  | 0  | 0  | 0   | 0  | 0   | 0   | 0   | 0   | 0   | 0   | 0   | 0        | 0             | 0     | 0     | 0       | 0             | 0       | 0    | 0        | 0     | 0         | 0     | 0         | 0     |
| ENR000011150: 5  | 0  | 0  | 0  | 0  | 0  | 0  | 0  | 0   | 0  | 0   | 0   | 0   | 0   | 0   | 0   | 0   | 0        | 0             | 0     | 0     | 0       | 0             | 0       | 0    | 0        | 0     | 0         | 0     | 0         | 0     |
| ENR000011151: 5  | 0  | 0  | 0  | 0  | 0  | 0  | 0  | 0   | 0  | 0   | 0   | 0   | 0   | 0   | 0   | 0   | 0        | 0             | 0     | 0     | 0       | 0             | 0       | 0    | 0        | 0     | 0         | 0     | 0         | 0     |
| ENR000011152: 5  | 0  | 0  | 0  | 0  | 0  | 0  | 0  | 0   | 0  | 0   | 0   | 0   | 0   | 0   | 0   | 0   | 0        | 0             | 0     | 0     | 0       | 0             | 0       | 0    | 0        | 0     | 0         | 0     | 0         | 0     |
| ENR000011153: 5  | 0  | 0  | 0  | 0  | 0  | 0  | 0  | 0   | 0  | 0   | 0   | 0   | 0   | 0   | 0   | 0   | 0        | 0             | 0     | 0     | 0       | 0             | 0       | 0    | 0        | 0     | 0         | 0     | 0         | 0     |
| ENR000011154: 5  | 0  | 0  | 0  | 0  | 0  | 0  | 0  | 0   | 0  | 0   | 0   | 0   | 0   | 0   | 0   | 0   | 0        | 0             | 0     | 0     | 0       | 0             | 0       | 0    | 0        | 0     | 0         | 0     | 0         | 0     |
| ENR000011155: 5  | 0  | 0  | 0  | 0  | 0  | 0  | 0  | 0   | 0  | 0   | 0   | 0   | 0   | 0   | 0   | 0   | 0        | 0             | 0     | 0     | 0       | 0             | 0       | 0    | 0        | 0     | 0         | 0     | 0         | 0     |
| ENR000011156: 5  | 0  | 0  | 0  | 0  | 0  | 0  | 0  | 0   | 0  | 0   | 0   | 0   | 0   | 0   | 0   | 0   | 0        | 0             | 0     | 0     | 0       | 0             | 0       | 0    | 0        | 0     | 0         | 0     | 0         | 0     |
| ENR000011157: 5  | 0  | 0  | 0  | 0  | 0  | 0  | 0  | 0   | 0  | 0   | 0   | 0   | 0   | 0   | 0   | 0   | 0        | 0             | 0     | 0     | 0       | 0             | 0       | 0    | 0        | 0     | 0         | 0     | 0         | 0     |
| ENR000011158: 5  | 0  | 0  | 0  | 0  | 0  | 0  | 0  | 0   | 0  | 0   | 0   | 0   | 0   | 0   | 0   | 0   | 0        | 0             | 0     | 0     | 0       | 0             | 0       | 0    | 0        | 0     | 0         | 0     | 0         | 0     |
| ENR000011159: 5  | 0  | 0  | 0  | 0  | 0  | 0  | 0  | 0   | 0  | 0   | 0   | 0   | 0   | 0   | 0   | 0   | 0        | 0             | 0     | 0     | 0       | 0             | 0       | 0    | 0        | 0     | 0         | 0     | 0         | 0     |
| ENR000011160: 5  | 0  | 0  | 0  | 0  | 0  | 0  | 0  | 0   | 0  | 0   | 0   | 0   | 0   | 0   | 0   | 0   | 0        | 0             | 0     | 0     | 0       | 0             | 0       | 0    | 0        | 0     | 0         | 0     | 0         | 0     |
| ENR000011161: 5  | 0  | 0  | 0  | 0  | 0  | 0  | 0  | 0   | 0  | 0   | 0   | 0   | 0   | 0   | 0   | 0   | 0        | 0             | 0     | 0     | 0       | 0             | 0       | 0    | 0        | 0     | 0         | 0     | 0         | 0     |
| ENR000011162: 5  | 0  | 0  | 0  | 0  | 0  | 0  | 0  | 0   | 0  | 0   | 0   | 0   | 0   | 0   | 0   | 0   | 0        | 0             | 0     | 0     | 0       | 0             | 0       | 0    | 0        | 0     | 0         | 0     | 0         | 0     |
| ENR000011163: 5  | 0  | 0  | 0  | 0  | 0  | 0  | 0  | 0   | 0  | 0   | 0   | 0   | 0   | 0   | 0   | 0   | 0        | 0             | 0     | 0     | 0       | 0             | 0       | 0    | 0        | 0     | 0         | 0     | 0         | 0     |
| ENR000011164: 5  | 0  | 0  | 0  | 0  | 0  | 0  | 0  | 0   | 0  | 0   | 0   | 0   | 0   | 0   | 0   | 0   | 0        | 0             | 0     | 0     | 0       | 0             | 0       | 0    | 0        | 0     | 0         | 0     | 0         | 0     |
| ENR000011165: 5  | 0  | 0  | 0  | 0  | 0  | 0  | 0  | 0   | 0  | 0   | 0   | 0   | 0   | 0   | 0   | 0   | 0        | 0             | 0     | 0     | 0       | 0             | 0       | 0    | 0        | 0     | 0         | 0     | 0         | 0     |
| ENR000011166: 5  | 0  | 0  | 0  | 0  | 0  | 0  | 0  | 0   | 0  | 0   | 0   | 0   | 0   | 0   | 0   | 0   | 0        | 0             | 0     | 0     | 0       | 0             | 0       | 0    | 0        | 0     | 0         | 0     | 0         | 0     |
| ENR000011167: 5  | 0  | 0  | 0  | 0  | 0  | 0  | 0  | 0   | 0  | 0   | 0   | 0   | 0   | 0   | 0   | 0   | 0        | 0             | 0     | 0     | 0       | 0             | 0       | 0    | 0        | 0     | 0         | 0     | 0         | 0     |
| ENR000011168: 5  | 0  | 0  | 0  | 0  | 0  | 0  | 0  | 0   | 0  | 0   | 0   | 0   | 0   | 0   | 0   | 0   | 0        | 0             | 0     | 0     | 0       | 0             | 0       | 0    | 0        | 0     | 0         | 0     | 0         | 0     |
| ENR000011169: 5  | 0  | 0  | 0  | 0  | 0  | 0  | 0  | 0   | 0  | 0   | 0   | 0   | 0   | 0   | 0   | 0   | 0        | 0             | 0     | 0     | 0       | 0             | 0       | 0    | 0        | 0     | 0         | 0     | 0         | 0     |
| ENR000011170: 5  | 0  | 0  | 0  | 0  | 0  | 0  | 0  | 0   | 0  | 0   | 0   | 0   | 0   | 0   | 0   | 0   | 0        | 0             | 0     | 0     | 0       | 0             | 0       | 0    | 0        | 0     | 0         | 0     | 0         | 0     |
| ENR000011171: 5  | 0  | 0  | 0  | 0  | 0  | 0  | 0  | 0   | 0  | 0   | 0   | 0   | 0   | 0   | 0   | 0   | 0        | 0             | 0     | 0     | 0       | 0             | 0       | 0    | 0        | 0     | 0         | 0     | 0         | 0     |
| ENR000011172: 5  | 0  | 0  | 0  | 0  | 0  | 0  | 0  | 0   | 0  | 0   | 0   | 0   | 0   | 0   | 0   | 0   | 0        | 0             | 0     | 0     | 0       | 0             | 0       | 0    | 0        | 0     | 0         | 0     | 0         | 0     |
| ENR000011173: 5  | 0  | 0  | 0  | 0  | 0  | 0  | 0  | 0   | 0  | 0   | 0   | 0   | 0   | 0   | 0   | 0   | 0        | 0             | 0     | 0     | 0       | 0             | 0       | 0    | 0        | 0     | 0         | 0     | 0         | 0     |
| ENR000011174: 5  | 0  | 0  | 0  | 0  | 0  | 0  | 0  | 0   | 0  | 0   | 0   | 0   | 0   | 0   | 0   | 0   | 0        | 0             | 0     | 0     | 0       | 0             | 0       | 0    | 0        | 0     | 0         | 0     | 0         | 0     |
| ENR000011175: 5  | 0  | 0  | 0  | 0  | 0  | 0  | 0  | 0   | 0  | 0   | 0   | 0   | 0   | 0   | 0   | 0   | 0        | 0             | 0     | 0     | 0       | 0             | 0       | 0    | 0        | 0     | 0         | 0     | 0         | 0     |
| ENR000011176: 5  | 0  | 0  | 0  | 0  | 0  | 0  | 0  | 0   | 0  | 0   | 0   | 0   | 0   | 0   | 0   | 0   | 0        | 0             | 0     | 0     | 0       | 0             | 0       | 0    | 0        | 0     | 0         | 0     | 0         | 0     |
| ENR000011177: 5  | 0  | 0  | 0  | 0  | 0  | 0  | 0  | 0   | 0  | 0   | 0   | 0   | 0   | 0   | 0   | 0   | 0        | 0             | 0     | 0     | 0       | 0             | 0       | 0    | 0        | 0     | 0         | 0     | 0         | 0     |
| ENR000011178: 5  | 0  | 0  | 0  | 0  | 0  | 0  | 0  | 0   | 0  | 0   | 0   | 0   | 0   | 0   | 0   | 0   | 0        | 0             | 0     | 0     | 0       | 0             | 0       | 0    | 0        | 0     | 0         | 0     | 0         | 0     |
| ENR000011179: 5  | 0  | 0  | 0  | 0  | 0  | 0  | 0  | 0   | 0  | 0   | 0   | 0   | 0   | 0   | 0   | 0   | 0        | 0             | 0     | 0     | 0       | 0             | 0       | 0    | 0        | 0     | 0         | 0     | 0         | 0     |
| ENR000011180: 5  | 0  | 0  | 0  | 0  | 0  | 0  | 0  | 0   | 0  | 0   | 0   | 0   | 0   | 0   | 0   | 0   | 0        | 0             | 0     | 0     | 0       | 0             | 0       | 0    | 0        | 0     | 0         | 0     | 0         | 0     |
| ENR000011181: 5  | 0  | 0  | 0  | 0  | 0  | 0  | 0  | 0   | 0  | 0   | 0   | 0   | 0   | 0   | 0   | 0   | 0        | 0             | 0     | 0     | 0       | 0             | 0       | 0    | 0        | 0     | 0         | 0     |           |       |



[illegible]

Figure 1. Coverage of the 131,000 bp region of the *hprt* gene. The bar chart shows the coverage of the region for each of the 131,000 bp regions. The y-axis represents Coverage (bp) from 0 to 2000. The x-axis represents the region (p8 to p13). The bars are colored red and blue. The table below shows the average and maximum coverage for each region.

| Region | Average | Max |
|--------|---------|-----|
| p8     | 43.39   | 527 |
| p10    | 9.32    | 138 |
| p11    | 20.69   | 297 |
| p12    | 19.45   | 244 |
| p14    | 23.75   | 513 |
| p17    | 25.13   | 418 |
| p18    | 10.29   | 234 |
| p20    | 23.08   | 515 |
| p21    | 8.233   | 185 |
| p24    | 8.537   | 168 |
| p25    | 27.79   | 447 |
| p27    | 9.174   | 127 |
| c4     | 30.83   | 448 |
| c11    | 13.61   | 204 |
| c12    | 16.2    | 317 |
| c13    | 17.2    | 252 |

| Series    | 1 | 2 | 3 | 4 | 5 | 6 | 7 | 8 | 9 | 10 | 11 | 12 | 13 | 14 | 15 | 16 | 17 | 18 | 19 | 20 | 21 | 22 | 23 | 24 | 25 | 26 | 27 | 28 | 29 | 30 | 31 | 32 | 33 | 34 | 35 | 36 | 37 | 38 | 39 | 40 | 41 | 42 | 43 | 44 | 45 | 46 | 47 | 48 | 49 | 50 | 51 | 52 | 53 | 54 | 55 | 56 | 57 | 58 | 59 | 60 | 61 | 62 | 63 | 64 | 65 | 66 | 67 | 68 | 69 | 70 | 71 | 72 | 73 | 74 | 75 | 76 | 77 | 78 | 79 | 80 | 81 | 82 | 83 | 84 | 85 | 86 | 87 | 88 | 89 | 90 | 91 | 92 | 93 | 94 | 95 | 96 | 97 | 98 | 99 | 100 |
|-----------|---|---|---|---|---|---|---|---|---|----|----|----|----|----|----|----|----|----|----|----|----|----|----|----|----|----|----|----|----|----|----|----|----|----|----|----|----|----|----|----|----|----|----|----|----|----|----|----|----|----|----|----|----|----|----|----|----|----|----|----|----|----|----|----|----|----|----|----|----|----|----|----|----|----|----|----|----|----|----|----|----|----|----|----|----|----|----|----|----|----|----|----|----|----|----|----|----|----|----|-----|
| Series 1  | 1 | 2 | 3 | 4 | 5 | 6 | 7 | 8 | 9 | 10 | 11 | 12 | 13 | 14 | 15 | 16 | 17 | 18 | 19 | 20 | 21 | 22 | 23 | 24 | 25 | 26 | 27 | 28 | 29 | 30 | 31 | 32 | 33 | 34 | 35 | 36 | 37 | 38 | 39 | 40 | 41 | 42 | 43 | 44 | 45 | 46 | 47 | 48 | 49 | 50 | 51 | 52 | 53 | 54 | 55 | 56 | 57 | 58 | 59 | 60 | 61 | 62 | 63 | 64 | 65 | 66 | 67 | 68 | 69 | 70 | 71 | 72 | 73 | 74 | 75 | 76 | 77 | 78 | 79 | 80 | 81 | 82 | 83 | 84 | 85 | 86 | 87 | 88 | 89 | 90 | 91 | 92 | 93 | 94 | 95 | 96 | 97 | 98 | 99 | 100 |
| Series 2  | 1 | 2 | 3 | 4 | 5 | 6 | 7 | 8 | 9 | 10 | 11 | 12 | 13 | 14 | 15 | 16 | 17 | 18 | 19 | 20 | 21 | 22 | 23 | 24 | 25 | 26 | 27 | 28 | 29 | 30 | 31 | 32 | 33 | 34 | 35 | 36 | 37 | 38 | 39 | 40 | 41 | 42 | 43 | 44 | 45 | 46 | 47 | 48 | 49 | 50 | 51 | 52 | 53 | 54 | 55 | 56 | 57 | 58 | 59 | 60 | 61 | 62 | 63 | 64 | 65 | 66 | 67 | 68 | 69 | 70 | 71 | 72 | 73 | 74 | 75 | 76 | 77 | 78 | 79 | 80 | 81 | 82 | 83 | 84 | 85 | 86 | 87 | 88 | 89 | 90 | 91 | 92 | 93 | 94 | 95 | 96 | 97 | 98 | 99 | 100 |
| Series 3  | 1 | 2 | 3 | 4 | 5 | 6 | 7 | 8 | 9 | 10 | 11 | 12 | 13 | 14 | 15 | 16 | 17 | 18 | 19 | 20 | 21 | 22 | 23 | 24 | 25 | 26 | 27 | 28 | 29 | 30 | 31 | 32 | 33 | 34 | 35 | 36 | 37 | 38 | 39 | 40 | 41 | 42 | 43 | 44 | 45 | 46 | 47 | 48 | 49 | 50 | 51 | 52 | 53 | 54 | 55 | 56 | 57 | 58 | 59 | 60 | 61 | 62 | 63 | 64 | 65 | 66 | 67 | 68 | 69 | 70 | 71 | 72 | 73 | 74 | 75 | 76 | 77 | 78 | 79 | 80 | 81 | 82 | 83 | 84 | 85 | 86 | 87 | 88 | 89 | 90 | 91 | 92 | 93 | 94 | 95 | 96 | 97 | 98 | 99 | 100 |
| Series 4  | 1 | 2 | 3 | 4 | 5 | 6 | 7 | 8 | 9 | 10 | 11 | 12 | 13 | 14 | 15 | 16 | 17 | 18 | 19 | 20 | 21 | 22 | 23 | 24 | 25 | 26 | 27 | 28 | 29 | 30 | 31 | 32 | 33 | 34 | 35 | 36 | 37 | 38 | 39 | 40 | 41 | 42 | 43 | 44 | 45 | 46 | 47 | 48 | 49 | 50 | 51 | 52 | 53 | 54 | 55 | 56 | 57 | 58 | 59 | 60 | 61 | 62 | 63 | 64 | 65 | 66 | 67 | 68 | 69 | 70 | 71 | 72 | 73 | 74 | 75 | 76 | 77 | 78 | 79 | 80 | 81 | 82 | 83 | 84 | 85 | 86 | 87 | 88 | 89 | 90 | 91 | 92 | 93 | 94 | 95 | 96 | 97 | 98 | 99 | 100 |
| Series 5  | 1 | 2 | 3 | 4 | 5 | 6 | 7 | 8 | 9 | 10 | 11 | 12 | 13 | 14 | 15 | 16 | 17 | 18 | 19 | 20 | 21 | 22 | 23 | 24 | 25 | 26 | 27 | 28 | 29 | 30 | 31 | 32 | 33 | 34 | 35 | 36 | 37 | 38 | 39 | 40 | 41 | 42 | 43 | 44 | 45 | 46 | 47 | 48 | 49 | 50 | 51 | 52 | 53 | 54 | 55 | 56 | 57 | 58 | 59 | 60 | 61 | 62 | 63 | 64 | 65 | 66 | 67 | 68 | 69 | 70 | 71 | 72 | 73 | 74 | 75 | 76 | 77 | 78 | 79 | 80 | 81 | 82 | 83 | 84 | 85 | 86 | 87 | 88 | 89 | 90 | 91 | 92 | 93 | 94 | 95 | 96 | 97 | 98 | 99 | 100 |
| Series 6  | 1 | 2 | 3 | 4 | 5 | 6 | 7 | 8 | 9 | 10 | 11 | 12 | 13 | 14 | 15 | 16 | 17 | 18 | 19 | 20 | 21 | 22 | 23 | 24 | 25 | 26 | 27 | 28 | 29 | 30 | 31 | 32 | 33 | 34 | 35 | 36 | 37 | 38 | 39 | 40 | 41 | 42 | 43 | 44 | 45 | 46 | 47 | 48 | 49 | 50 | 51 | 52 | 53 | 54 | 55 | 56 | 57 | 58 | 59 | 60 | 61 | 62 | 63 | 64 | 65 | 66 | 67 | 68 | 69 | 70 | 71 | 72 | 73 | 74 | 75 | 76 | 77 | 78 | 79 | 80 | 81 | 82 | 83 | 84 | 85 | 86 | 87 | 88 | 89 | 90 | 91 | 92 | 93 | 94 | 95 | 96 | 97 | 98 | 99 | 100 |
| Series 7  | 1 | 2 | 3 | 4 | 5 | 6 | 7 | 8 | 9 | 10 | 11 | 12 | 13 | 14 | 15 | 16 | 17 | 18 | 19 | 20 | 21 | 22 | 23 | 24 | 25 | 26 | 27 | 28 | 29 | 30 | 31 | 32 | 33 | 34 | 35 | 36 | 37 | 38 | 39 | 40 | 41 | 42 | 43 | 44 | 45 | 46 | 47 | 48 | 49 | 50 | 51 | 52 | 53 | 54 | 55 | 56 | 57 | 58 | 59 | 60 | 61 | 62 | 63 | 64 | 65 | 66 | 67 | 68 | 69 | 70 | 71 | 72 | 73 | 74 | 75 | 76 | 77 | 78 | 79 | 80 | 81 | 82 | 83 | 84 | 85 | 86 | 87 | 88 | 89 | 90 | 91 | 92 | 93 | 94 | 95 | 96 | 97 | 98 | 99 | 100 |
| Series 8  | 1 | 2 | 3 | 4 | 5 | 6 | 7 | 8 | 9 | 10 | 11 | 12 | 13 | 14 | 15 | 16 | 17 | 18 | 19 | 20 | 21 | 22 | 23 | 24 | 25 | 26 | 27 | 28 | 29 | 30 | 31 | 32 | 33 | 34 | 35 | 36 | 37 | 38 | 39 | 40 | 41 | 42 | 43 | 44 | 45 | 46 | 47 | 48 | 49 | 50 | 51 | 52 | 53 | 54 | 55 | 56 | 57 | 58 | 59 | 60 | 61 | 62 | 63 | 64 | 65 | 66 | 67 | 68 | 69 | 70 | 71 | 72 | 73 | 74 | 75 | 76 | 77 | 78 | 79 | 80 | 81 | 82 | 83 | 84 | 85 | 86 | 87 | 88 | 89 | 90 | 91 | 92 | 93 | 94 | 95 | 96 | 97 | 98 | 99 | 100 |
| Series 9  | 1 | 2 | 3 | 4 | 5 | 6 | 7 | 8 | 9 | 10 | 11 | 12 | 13 | 14 | 15 | 16 | 17 | 18 | 19 | 20 | 21 | 22 | 23 | 24 | 25 | 26 | 27 | 28 | 29 | 30 | 31 | 32 | 33 | 34 | 35 | 36 | 37 | 38 | 39 | 40 | 41 | 42 | 43 | 44 | 45 | 46 | 47 | 48 | 49 | 50 | 51 | 52 | 53 | 54 | 55 | 56 | 57 | 58 | 59 | 60 | 61 | 62 | 63 | 64 | 65 | 66 | 67 | 68 | 69 | 70 | 71 | 72 | 73 | 74 | 75 | 76 | 77 | 78 | 79 | 80 | 81 | 82 | 83 | 84 | 85 | 86 | 87 | 88 | 89 | 90 | 91 | 92 | 93 | 94 | 95 | 96 | 97 | 98 | 99 | 100 |
| Series 10 | 1 | 2 | 3 | 4 | 5 | 6 | 7 | 8 | 9 | 10 | 11 | 12 | 13 | 14 | 15 | 16 | 17 | 18 | 19 | 20 | 21 | 22 | 23 | 24 | 25 | 26 | 27 | 28 | 29 | 30 | 31 | 32 | 33 | 34 | 35 | 36 | 37 | 38 | 39 | 40 | 41 | 42 | 43 | 44 | 45 | 46 | 47 | 48 | 49 | 50 | 51 | 52 | 53 | 54 | 55 | 56 | 57 | 58 | 59 | 60 | 61 | 62 | 63 | 64 | 65 | 66 | 67 | 68 | 69 | 70 | 71 | 72 | 73 | 74 | 75 | 76 | 77 | 78 | 79 | 80 | 81 | 82 | 83 | 84 | 85 | 86 | 87 | 88 | 89 | 90 | 91 | 92 | 93 | 94 | 95 | 96 | 97 | 98 | 99 | 100 |
| Series 11 | 1 | 2 | 3 | 4 | 5 | 6 | 7 | 8 | 9 | 10 | 11 | 12 | 13 | 14 | 15 | 16 | 17 | 18 | 19 | 20 | 21 | 22 | 23 | 24 | 25 | 26 | 27 | 28 | 29 | 30 | 31 | 32 | 33 | 34 | 35 | 36 | 37 | 38 | 39 | 40 | 41 | 42 | 43 | 44 | 45 | 46 | 47 | 48 | 49 | 50 | 51 | 52 | 53 | 54 | 55 | 56 | 57 | 58 | 59 | 60 | 61 | 62 | 63 | 64 | 65 | 66 | 67 | 68 | 69 | 70 | 71 | 72 | 73 | 74 | 75 | 76 | 77 | 78 | 79 | 80 | 81 | 82 | 83 | 84 | 85 | 86 | 87 | 88 | 89 | 90 | 91 | 92 | 93 | 94 | 95 | 96 | 97 | 98 | 99 | 100 |
| Series 12 | 1 | 2 | 3 | 4 | 5 | 6 | 7 | 8 | 9 | 10 | 11 | 12 | 13 | 14 | 15 | 16 | 17 | 18 | 19 | 20 | 21 | 22 | 23 | 24 | 25 | 26 | 27 | 28 | 29 | 30 | 31 | 32 | 33 | 34 | 35 | 36 | 37 | 38 | 39 | 40 | 41 | 42 | 43 | 44 | 45 | 46 | 47 | 48 | 49 | 50 | 51 | 52 | 53 | 54 | 55 | 56 | 57 | 58 | 59 | 60 | 61 | 62 | 63 | 64 | 65 | 66 | 67 | 68 | 69 | 70 | 71 | 72 | 73 | 74 | 75 | 76 | 77 | 78 | 79 | 80 | 81 | 82 | 83 | 84 | 85 | 86 | 87 | 88 | 89 | 90 | 91 | 92 | 93 | 94 | 95 | 96 | 97 | 98 | 99 | 100 |
| Series 13 | 1 | 2 | 3 | 4 | 5 | 6 | 7 | 8 | 9 | 10 | 11 | 12 | 13 | 14 | 15 | 16 | 17 | 18 | 19 | 20 | 21 | 22 | 23 | 24 | 25 | 26 | 27 | 28 | 29 | 30 | 31 | 32 | 33 | 34 | 35 | 36 | 37 | 38 | 39 | 40 | 41 | 42 | 43 | 44 | 45 | 46 | 47 | 48 | 49 | 50 | 51 | 52 | 53 | 54 | 55 | 56 | 57 | 58 | 59 | 60 | 61 | 62 | 63 | 64 | 65 | 66 | 67 | 68 | 69 | 70 | 71 | 72 | 73 | 74 | 75 | 76 | 77 | 78 | 79 | 80 | 81 | 82 | 83 | 84 | 85 | 86 | 87 | 88 | 89 | 90 | 91 | 92 | 93 | 94 | 95 | 96 | 97 | 98 | 99 | 100 |
| Series 14 | 1 | 2 | 3 | 4 | 5 | 6 | 7 | 8 | 9 | 10 | 11 | 12 | 13 | 14 | 15 | 16 | 17 | 18 | 19 | 20 | 21 | 22 | 23 | 24 | 25 | 26 | 27 | 28 | 29 | 30 | 31 | 32 | 33 | 34 | 35 | 36 | 37 | 38 | 39 | 40 | 41 | 42 | 43 | 44 | 45 | 46 | 47 | 48 | 49 | 50 | 51 | 52 | 53 | 54 | 55 | 56 | 57 | 58 | 59 | 60 | 61 | 62 | 63 | 64 | 65 | 66 | 67 | 68 | 69 | 70 | 71 | 72 | 73 | 74 | 75 | 76 | 77 | 78 | 79 | 80 | 81 | 82 | 83 | 84 | 85 | 86 | 87 | 88 | 89 | 90 | 91 | 92 | 93 | 94 | 95 | 96 | 97 | 98 | 99 | 100 |
| Series 15 | 1 | 2 | 3 | 4 | 5 | 6 | 7 | 8 | 9 | 10 | 11 | 12 | 13 | 14 | 15 | 16 | 17 | 18 | 19 | 20 | 21 | 22 | 23 | 24 | 25 | 26 | 27 | 28 | 29 | 30 | 31 | 32 | 33 | 34 | 35 | 36 | 37 | 38 | 39 | 40 | 41 | 42 | 43 | 44 | 45 | 46 | 47 | 48 | 49 | 50 | 51 | 52 | 53 | 54 | 55 | 56 | 57 | 58 | 59 | 60 | 61 | 62 | 63 | 64 | 65 | 66 | 67 | 68 | 69 | 70 | 71 | 72 | 73 | 74 | 75 | 76 | 77 | 78 | 79 | 80 | 81 | 82 | 83 | 84 | 85 | 86 | 87 | 88 | 89 | 90 | 91 | 92 | 93 | 94 | 95 | 96 | 97 | 98 | 99 | 100 |
| Series 16 | 1 | 2 | 3 | 4 | 5 | 6 | 7 | 8 | 9 | 10 | 11 | 12 | 13 | 14 | 15 | 16 | 17 | 18 | 19 | 20 | 21 | 22 | 23 | 24 | 25 | 26 | 27 | 28 | 29 | 30 | 31 | 32 | 33 | 34 | 35 | 36 | 37 | 38 | 39 | 40 | 41 | 42 | 43 | 44 | 45 | 46 | 47 | 48 | 49 | 50 | 51 | 52 | 53 | 54 | 55 | 56 | 57 | 58 | 59 | 60 | 61 | 62 | 63 | 64 | 65 | 66 | 67 | 68 | 69 | 70 | 71 | 72 | 73 | 74 | 75 | 76 | 77 | 78 | 79 | 80 | 81 | 82 | 83 | 84 | 85 | 86 | 87 | 88 | 89 | 90 | 91 | 92 | 93 | 94 | 95 | 96 | 97 | 98 | 99 | 100 |
| Series 17 | 1 | 2 | 3 | 4 | 5 | 6 | 7 | 8 | 9 | 10 | 11 | 12 | 13 | 14 | 15 | 16 | 17 | 18 | 19 | 20 | 21 | 22 | 23 | 24 | 25 | 26 | 27 | 28 | 29 | 30 | 31 | 32 | 33 | 34 | 35 | 36 | 37 | 38 | 39 | 40 | 41 | 42 | 43 | 44 | 45 | 46 | 47 | 48 | 49 | 50 | 51 | 52 | 53 | 54 | 55 | 56 | 57 | 58 |    |    |    |    |    |    |    |    |    |    |    |    |    |    |    |    |    |    |    |    |    |    |    |    |    |    |    |    |    |    |    |    |    |    |    |    |    |    |    |    |    |     |

| SNR     | 33971   | 24826  | 10801   | 17371   | 17693   | 41882  | 13833  | 10820  | 12854   | 12100   | 13103   | 148516  | 121201  | 129300   | 120201   | 1284256    |
|---------|---------|--------|---------|---------|---------|--------|--------|--------|---------|---------|---------|---------|---------|----------|----------|------------|
| 0       | 0       | 0      | 0       | 0       | 0       | 0      | 0      | 0      | 0       | 0       | 0       | 0       | 0       | 0        | 0        | 0          |
| AVERAGE | 75.594  | 56.68  | 40.5564 | 39.68   | 40.395  | 111.16 | 123.33 | 100.29 | 247.43  | 299.03  | 208.84  | 236.75  | 219.625 | 238.025  | 235.025  | 235.025    |
| STDEV   | 3.94    | 3.22   | 4.71    | 3.62    | 4.71    | 3.24   | 3.005  | 2.97   | 2.92    | 3.94    | 2.97    | 3.03    | 2.94    | 3.1      | 3.1      | 3.1        |
| COUNT=0 | 0       | 0      | 15      | 13      | 13      | 5      | 4      | 4      | 4       | 4       | 4       | 4       | 4       | 4        | 4        | 4          |
| COUNT=1 | 3.6597  | 1.03   | 1.924   | 2.5142  | 2.5142  | 2.968  | 1.414  | 0.9132 | 1.82408 | 0.9132  | 0.65662 | 1.3009  | 2.04765 | 1.143152 | 1.143152 | 1.143152   |
| COUNT=2 | 22      | 24     | 34      | 41      | 25      | 22     | 10     | 17     | 17      | 18      | 11      | 20      | 12      | 20       | 21       | 13         |
| COUNT=3 | 5.02    | 14.54  | 9.7626  | 9.9807  | 5.9778  | 2.19   | 4.379  | 3.813  | 3.6378  | 4.038   | 2.6662  | 2.79728 | 4.74761 | 2.6662   | 2.6662   | 2.6662     |
| COUNT=4 | 440     | 388    | 397     | 388     | 402     | 403    | 416    | 417    | 514     | 420     | 420     | 412     | 411     | 412      | 400      | 400        |
| COUNT=5 | 91.242  | 80.43  | 81.8    | 91.1968 | 92.228  | 90.12  | 91.221 | 95.205 | 95.435  | 91.221  | 95.435  | 91.221  | 95.435  | 91.221   | 95.435   | 91.221     |
| COUNT=6 | 83.516  | 83.333 | 80.594  | 75.224  | 75.445  | 82.416 | 80.5   | 80.868 | 82.904  | 80.509  | 82.27   | 84.7480 | 80.1    | 81.22744 | 80.8678  | 82.8806373 |
| %       | 0       | 0      | 0       | 0       | 0       | 0      | 0      | 0      | 0       | 0       | 0       | 0       | 0       | 0        | 0        | 0          |
| %-2SD   | 74.7493 | 57.968 | 47.175  | 44.984  | 43.954  | 79.724 | 87     | 87     | 87      | 88.611  | 86.714  | 86      | 86      | 87.668   | 84.7633  | 84.7633    |
| %-1SD   | 76.538  | 58.908 | 46.392  | 46.202  | 46.392  | 80.928 | 89.338 | 89.338 | 89.338  | 90.546  | 88.688  | 87.668  | 86.714  | 87.668   | 86.714   | 86.714     |
| %0      | 64.3836 | 59.961 | 50      | 49.772  | 48.0001 | 71.233 | 75.71  | 71.689 | 83.105  | 81.5068 | 83.333  | 80.073  | 80.822  | 81.5068  | 80.93631 | 83.1052223 |
| %1      | 76.538  | 58.908 | 46.392  | 46.202  | 46.392  | 80.928 | 89.338 | 89.338 | 89.338  | 90.546  | 88.688  | 87.668  | 86.714  | 87.668   | 86.714   | 86.714     |
| %2      | 74.7493 | 57.968 | 47.175  | 44.984  | 43.954  | 79.724 | 87     | 87     | 87      | 88.611  | 86.714  | 86      | 86      | 87.668   | 84.7633  | 84.7633    |
| %3      | 5.02    | 14.54  | 9.7626  | 9.9807  | 5.9778  | 2.19   | 4.379  | 3.813  | 3.6378  | 4.038   | 2.6662  | 2.79728 | 4.74761 | 2.6662   | 2.6662   | 2.6662     |
| %4      | 440     | 388    | 397     | 388     | 402     | 403    | 416    | 417    | 514     | 420     | 420     | 412     | 411     | 412      | 400      | 400        |
| %5      | 91.242  | 80.43  | 81.8    | 91.1968 | 92.228  | 90.12  | 91.221 | 95.205 | 95.435  | 91.221  | 95.435  | 91.221  | 95.435  | 91.221   | 95.435   | 91.221     |
| %6      | 83.516  | 83.333 | 80.594  | 75.224  | 75.445  | 82.416 | 80.5   | 80.868 | 82.904  | 80.509  | 82.27   | 84.7480 | 80.1    | 81.22744 | 80.8678  | 82.8806373 |

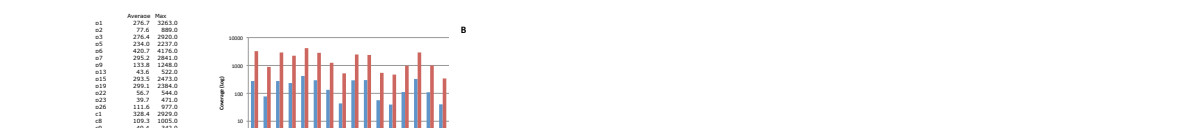

Supplement: f1 [file 617469.f1.pdf]
